1

## 2 **The sequences near Chi sites allow the RecBCD pathway to avoid** 3 **genomic rearrangements**

4 Chastity Li<sup>1\*</sup>, Claudia Danilowicz<sup>1\*</sup>, Tommy F. Tashjian<sup>2</sup>, Veronica G. Godoy<sup>2</sup>, Chantal Prévost<sup>3</sup>, Mara  
5 Prentiss<sup>1</sup>

6 <sup>1</sup>*Department of Physics, Harvard University, Cambridge, MA 02138, USA*, <sup>2</sup>*Department of Biology,*  
7 *Northeastern University, Boston, MA 02115, USA*, <sup>3</sup>*Laboratoire de BioChimie Théorique, CNRS UMR*  
8 *9080, IBPC, Paris, France*

9 \*These authors contributed equally to this work

10

### 11 **Abstract**

12 *Bacterial recombinational repair is initiated by RecBCD, which creates a 3' single-stranded DNA*  
13 *(ssDNA) tail on each side of a double strand break (DSB). Each tail terminates in a Chi site sequence*  
14 *that is usually distant from the break. Once an ssDNA-RecA filament forms on a tail, the tail searches*  
15 *for homologous double-stranded DNA (dsDNA) to use as template for DSB repair. Here we show that*  
16 *the nucleoprotein filaments rarely trigger sufficient synthesis to form an irreversible repair unless a*  
17 *long strand exchange product forms at the 3' end of the filament. Our experimental data and modeling*  
18 *suggest that terminating both filaments with Chi sites allows recombinational repair to strongly*  
19 *suppress fatal genomic rearrangements resulting from mistakenly joining different copies of a repeated*  
20 *sequence after a DSB has occurred within a repeat. Taken together our evidence highlights cellular safe*  
21 *fail mechanisms that bacteria use to avoid potentially lethal situations.*

22

### 23 **Introduction**

24 While eukaryotes use complex strategies (Ryu et al., 2016, Amaral et al., 2017) to avoid  
25 dangerous rearrangements that can result when repeated sequences interfere with double strand break  
26 (DSB) repair (Bao et al., 2015, Ryu et al., 2016, Amaral et al., 2017), bacterial strategies have  
27 remained mysterious. Understanding the mechanisms for rejecting major rearrangements in bacterial  
28 genomes may provide better predictions of possible rearrangements. Furthermore, knowledge of the  
29 role of Chi sites in the DSB repair may influence the efficiency of gene targeting (Dabert and Smith,  
30 1997).

31 When a DSB occurs in bacteria, it can be repaired using RecA-mediated homologous  
32 recombination following the well-known RecBCD pathway (Figure 1a) (Symington, 2014, Mawer and

33 Leach, 2014, Azeroglu et al., 2016, Kowalczykowski, 2015, Smith, 2012, Smith, 1991). RecBCD  
34 degrades or resects each end of the broken double-stranded DNAs (dsDNA) until it recognizes a Chi  
35 site. Chi sites are ~8 bp DNA sequences that alter the function of RecBCD to create two 3' ssDNA  
36 tails that terminate in Chi sites (Symington, 2014, Mawer and Leach, 2014, Azeroglu et al., 2016,  
37 Kowalczykowski, 2015, Smith, 2012, Smith, 1991) (Figure 1ai, ii). RecA then binds to the ssDNA  
38 tails, creating two ssDNA-RecA filaments with Chi sites at their 3' ends. Those ssDNA-RecA  
39 filaments then search for homologous regions in the dsDNA.

40 To determine whether a region of dsDNA is homologous to the initiating strand, ssDNA-RecA  
41 filaments attempt strand exchange. Strand exchange establishes Watson-Crick pairing between the  
42 initiating strand and one of the strands in the dsDNA. The first sequence matching test attempts to  
43 establish base pairing between approximately 8 nt (Howard-Flanders et al., 1984, Danilowicz et al.,  
44 2015, Qi et al., 2015, Bazemore et al., 1997, Yang et al., 2015, Hsieh et al., 1992). Evidently,  
45 formation of the 3-strand heteroduplex product is most favorable if the heteroduplex is sequence  
46 matched. If at least 7 of the 8 bp match, RecA promotes formation of a metastable 8 bp heteroduplex  
47 product pairing bases in the initiating strand with bases in the complementary strand (Howard-  
48 Flanders et al., 1984, Danilowicz et al., 2015, Qi et al., 2015, Bazemore et al., 1997, Yang et al., 2015,  
49 Hsieh et al., 1992). Strand exchange can then extend the heteroduplex product in a 5' to 3' direction  
50 with respect to the initiating ssDNA (Mawer and Leach, 2014, Cox, 2007, Gupta et al., 1998) (Figure  
51 1aiii). The stability of sequence matched strand exchange products increases strongly as the product  
52 length ( $L_{\text{prod}}$ ) increases from 8 to 20 bp (Hsieh et al., 1992, Danilowicz et al., 2015, Danilowicz et al.,  
53 2017, Qi et al., 2015), and *in vivo* results suggest that DNA repair is extraordinarily rare unless  $L_{\text{prod}} >$   
54 20 bp (Lovett et al., 2002, Watt et al., 1985, Shen and Huang, 1986).

55 In the presence of ATP hydrolysis, heteroduplex stability *in vitro* increases only slightly as  
56  $L_{\text{prod}}$  extends from 20 to 75 bp (Danilowicz et al., 2017). If  $L_{\text{prod}} > 80$  bp the nucleoprotein filament  
57 separates from the recombination complex (van der Heijden et al., 2008); however, even if  $L_{\text{prod}} > 80$   
58 bp, strand exchange products remain reversible (Rosselli and Stasiak, 1990, Danilowicz et al., 2017)  
59 unless two complete dsDNA strands are formed. In order to form two complete dsDNA strands, the  
60 bases removed by RecBCD ( $L_{\text{Chi}}$ ) must be replaced. That replacement is achieved by DNA synthesis  
61 that begins at the terminal 3' OH on each initiating strand and uses the complementary strand as  
62 template (Figure 1aiv) (Li et al., 2009, Liu et al., 2011).

63 Figure 1b shows a hypothetical alternate pathway for DSB repair, in which the 3' ends of the  
64 DSB form the 3' ends of the searching filaments, and the process is otherwise identical to the RecBCD  
65 pathway (Wilkinson et al., 2016, Singleton et al., 2004, Kowalczykowski, 2000, Dillingham and  
66 Kowalczykowski, 2008) In this work, we will compare the genomic rearrangement that would be  
67 produced by this hypothetical pathway with the outcome of the RecBCD pathway to highlight the  
68 advantages conferred by the following two features: 1. removing  $L_{\text{Chi}}$  bases flanking the DSB, and 2.  
69 ensuring that the searching ssDNA strands have Chi sites at their 3' ends. We will show that if repair  
70 follows the pathway shown in Figure 1a, these two features combined with the sequence distributions  
71 within bacterial genomes reduce or eliminate genomic rearrangements that would otherwise plague  
72 DSB repair.

## 74 Results

### 75 Long repeats are prevalent in bacterial genomes

76 Figure 2a, b illustrates that repeated sequences capable of forming a stable heteroduplex ( $L_{\text{prod}} > \sim 20$  bp) (Hsieh et al., 1992, Danilowicz et al., 2015, Bazemore et al., 1997, Qi et al., 2015) are particularly prevalent in the *E. coli* O157 genome (gray lines in Figure 2a, b). In contrast, such repeats are rare in sequences consisting of randomly chosen bases (random sequences with the same length as the *E. coli* O157 genome,  $\sim 5$  Mbp), as illustrated by the black lines in Figure 2a, b.

81 The rarity of long repeats in random sequences of the same length as an *E. coli* genome is also illustrated by the dark gray bar clearly seen in the inset of Figure 2c, in which the histogram shows the number of repeated sequences of  $N_{\text{repeat}}$  (length of a repeated sequence occurring anywhere in the genome) that are longer than 20 bp and shorter than 1000 bp. The bar represents averages over 100 random sequences with lengths of  $\sim 5$  Mbp. The green error bar shows the standard deviation. The data confirm that a homology test of 25-30 bp would be sufficient to prevent genomic rearrangements if bacterial sequences consisted of randomly selected bases (Vlassakis et al., 2013), since repeats shorter than  $\sim 25$  bp rarely form irreversible products *in vivo* (Lovett et al., 2002, Watt et al., 1985, Shen and Huang, 1986).

90 Figure 2c also suggests that substantial genomic rearrangements are likely to occur if irreversible recombination products were to form between a 20-30 bp repeats anywhere in the genome. Though the method that we used to find long repeated sequences only finds exact repeats, long repeated regions containing some mismatches appear in the graph as several shorter exact repeats. We find that those exactly repeated shorter regions are almost never separated by more than one single base.

96 *In vivo* results indicate that the probability of recombining DNA increases exponentially as the homologous region in the recombining DNA strand extends from  $N = 20$  to  $N = 75$ , where  $N = 75$  is more than 100x more probable than  $N = 50$  (Lovett et al., 2002, Watt et al., 1985). Remarkably, recombination increases only slightly as  $N$  increases from 75 to  $\sim 300$  bp. It has been speculated that *in vivo* several parallel sequence-matched interactions with  $L_{\text{prod}} < 75$  bp separated by  $\sim 200$  bp may enhance discrimination against  $N_{\text{repeat}} < \sim 200-300$  bp (Prentiss et al., 2015). Studies in *E. coli* suggest that RecA-dependent genomic rearrangements between directly repeated sequences in plasmids is improbable unless the repeat length is at least  $\sim 300$  bp, though RecA independent rearrangements between shorter repeats do occur (Bi and Liu, 1994).

105 *In vivo* results mix the discrimination provided by RecA alone with the discrimination provided by other factors, and we note that not all *in vivo* recombination follows the RecBCD pathway. In the following, we will demonstrate how the RecBCD pathway reduces the probability that a DSB creates one searching filament that includes a region of a repeat with  $75 < N < 300$  bp at its 3' end and eliminates the possibility that the 3' ends of both filaments will include more than 20 bases that originate from the same repeat.

111

## 112 **Removing $L_{\text{Chi}}$ bases by RecBCD promotes genomic stability**

113 Without considering the detailed statistical distribution of Chi sites with respect to repeats,  
114 some advantages of the RecBCD pathway can be appreciated by considering a case in which a DSB  
115 occurs in the middle of a long repeated sequence. In the hypothetical DSB repair mechanism  
116 illustrated in Figure 1b, a DSB occurring within a repeated sequence will create two searching  
117 filaments whose 3' ends terminate in regions of the repeated sequence that flanked the DSB. Genomic  
118 rearrangement will result if the two searching filaments pair with both sides of a different copy of the  
119 repeated sequence flanking the break.

120 In contrast, Figure 2 indicates that in the RecBCD pathway, which is illustrated in Figure 1a,  
121 the repeated sequence that flanked the DSB is likely to lie within the  $L_{\text{Chi}}$  bases removed by RecBCD.  
122 In particular, Figure 2d indicates that the space between adjacent Chi sites on opposite strands is  
123 typically  $> 10$  kb. Furthermore, Figure 2e indicates that since 30 % Chi site recognition is observed *in*  
124 *vivo* (Cockram et al., 2015, Taylor and Smith, 1992) an  $L_{\text{Chi}}$  distribution that peaks at  $\sim 50$  kb would  
125 be created.

126 Importantly, Figure 2f shows a histogram of the repeats averaged over four *E. coli* genomes.  
127 The maximum x-axis value in Figure 2f corresponds to the bin width size in Figure 2e. Thus, all of the  
128 repeats in the considered *E. coli* genomes have lengths that are smaller than 99.6 % of the  $L_{\text{Chi}}$  since the  
129 height of the first bin in Figure 2f is 0.4 %. This simple comparison of the maximum repeat length in  
130 the four *E. coli* genomes to the distribution of  $L_{\text{Chi}}$  values makes it plausible that the removal of the  
131  $L_{\text{Chi}}$  bases surrounding a DSB could strongly suppress genomic rearrangement due to the two  
132 searching filaments pairing with both sides of a different copy of the repeated sequence flanking the  
133 break.

## 134 **Homology determines whether DNA synthesis stabilizes repairs**

135 Other advantages of the RecBCD pathway emerge from more complex considerations that  
136 include detailed examination of bacterial sequences and experimental studies that determine what  
137 regions of the initiating ssDNA can lead to the DNA synthesis required for irreversible strand  
138 exchange and repair of the DSB. Previous work suggested that extension of the initiating strand by Pol  
139 IV may stabilize D-loops prior to re-establishment of a DNA polymerase III-dependent replication  
140 (Lovett, 2006), and that even in eukaryotic cells, translesion polymerases may aid DSB repair by  
141 stabilizing strand invasion intermediates (Lovett, 2006). This is consistent with new work indicating  
142 that most Pol IV molecules carry out DNA synthesis outside replisomes (Henrikus et al., 2018).

143 In these experiments, we study DNA synthesis by *E. coli* DNA Polymerase IV (Pol IV) as well  
144 as by the large fragment of *Bacillus subtilis* DNA polymerase I (LF-Bsu). These polymerases both  
145 lack 3'-5' exonuclease activity. LF-Bsu has been modified to remove the exonuclease activity that Pol  
146 IV intrinsically lacks. In the following, we will present experimental results for both proteins  
147 indicating that under conditions relevant *in vivo*, DNA synthesis initiated by RecA-mediated  
148 homology recognition is highly unlikely unless there is a sequence matched heteroduplex product with  
149 length  $L_{\text{prod}} > 50$  bp that terminates within 8 bp of the 3' end of the initiating strand.

150 We first formed ssDNA-RecA filaments and then allowed these filaments to interact with the  
151 dsDNA. If a sufficiently stable heteroduplex forms, a DNA polymerase can extend the initiating  
152 strand. That extension begins at the terminal 3' OH of the initiating strand and proceeds in the 5' to 3'  
153 direction with respect to the initiating strand. In our *in vitro* experiments, the synthesis can eventually  
154 reach an end of the dsDNA. We will refer to that end of the dsDNA as the 3p end. We will specify  
155 positions in the dsDNA using  $D$ , their separation from the 3p end of the dsDNA. We monitored the  
156 base pairing between the two strands in the dsDNA by measuring the emission due to a fluorescein  
157 label on one of the dsDNA strands (Figure 3a). Initially, the fluorescein emission is quenched by the  
158 nearby rhodamine label on the other strand, but if dsDNA separates, the fluorescence emission will  
159 increase.

160 To study effects due to the DNA polymerases, we positioned the dsDNA labels  $\Delta L$  base pairs  
161 beyond the 3' end of the filament.  $\Delta L$  was chosen to be large enough that long strand exchange  
162 products do not produce significant fluorescence increases even if the product extends to the 3' end of  
163 the filament. In what follows, we will show that under these conditions the presence of a DNA  
164 polymerase lacking 3'-5' exonuclease activity can produce large fluorescence increases as long as  
165 RecA filaments and dNTPs are present. Importantly, this fluorescence also depends strongly on  $N$ , the  
166 number of contiguous bases in the dsDNA that are complementary to the corresponding bases in the  
167 initiating strand.

168 In the first set of experiments, the fluorescent labels were located at  $D_{\text{label}} \sim 10$  bp and the 3'  
169 end of the initiating strand was positioned at  $D_{\text{init}} = 15$  bp as shown schematically in Figure 3a (bracket  
170 on top of the schematic). The 15 base pairs that extend beyond the 3' end of the filament are indicated  
171 in yellow. The same 90 bp labeled dsDNA target was used in all of the experiments illustrated in  
172 Figure 3a. We varied the homology between the dsDNA and the ssDNA-RecA filaments by changing  
173 the sequence of the initiating ssDNA. In particular, different 98 nt sequences were designed to be  
174 heterologous to the dsDNA except for  $N$  contiguous bases at the 3' end of the filament that match the  
175 corresponding  $N$  bases in the dsDNA (shown by the green brackets in Figure 3a, and encompassing  
176 20, 36, 50, and 75 base pairs).

177 Figure 3b shows graphs of  $\Delta F$ , the difference between the measured fluorescence as a function  
178 of time and the average initial fluorescence value for a heterologous ssDNA-RecA filament. These  
179 experiments were carried out with DNA Pol IV, ssDNA-RecA filaments, and dNTPs. Figure 3c shows  
180 the analogous results with LF-Bsu. In Figure 3b, c, each of the curves represents results for different  $N$   
181 values. Results obtained without DNA polymerase are shown in Figure 3- figure supplement 1, along  
182 with results obtained with DNA Pol IV and RecA, but without dNTPs. Comparison of Figure 3b, c  
183 with Figure 3- figure supplement 1 suggests that the observed fluorescence increase is dominated by  
184 DNA synthesis rather than dsDNA melting due to either strand exchange alone or DNA Pol IV  
185 binding without synthesis. Thus, those results suggest that in experiments performed with dNTPs, the  
186 fluorescence signals are dominated by DNA synthesis that extends the initiating strand toward the  
187 fluorescent labels.

188 If the DNA synthesis that dominates the contribution to that fluorescent signal made  
189 recombination irreversible, the curves for  $N = 75$  and  $N = 50$  in Figure 3 would approach the same  
190 asymptotic value corresponding to 100 % product formation. In contrast, Figure 3b, c shows that the

191 results for  $N = 50$  approach a lower asymptotic value than the results for  $N = 75$ . The significant but  
192 lower asymptotic value achieved by  $N = 50$  suggests that synthesis that is sufficient to trigger  
193 observable fluorescence does not always create a product in which the initiating and complementary  
194 strands are irreversibly paired. Thus, Figure 3 shows that the complementary strand can return its base  
195 pairing to the outgoing strand even after some synthesis has occurred.

196 Additional results for LF-Bsu are shown in Figure 3- figure supplement 2. In those  
197 experiments  $D_{\text{init}}$  is also 15 bp, but the fluorescent labels are positioned at the 3' end of the filament  
198 ( $D_{\text{label}}=0$  and  $\Delta L = 15$ ), whereas in Figure 3  $D_{\text{label}} = 10$  and  $\Delta L = 5$ . Those results also indicate that the  
199 fluorescence increase due to DNA synthesis is small unless  $N > \sim 36$  bp. In sum, even though the  
200 intrinsic processivity for DNA Pol IV is different from the processivity of LF-Bsu, the similarity  
201 between Figure 3b, c and Figure 3- figure supplement 2 suggests that the results represent general  
202 features of DNA synthesis triggered by the formation of heteroduplex products, at least for DNA  
203 polymerases that lack 3' to 5' exonuclease activity.

### 204 **Adjacent homoduplex dsDNA decreases product stability**

205 *In vivo*, the three strand heteroduplex products resulting from the pairing of the initiating and  
206 complementary strands are almost always flanked by homoduplex dsDNA of the complementary and  
207 outgoing strands. Previous work has suggested that this homoduplex dsDNA drives reversal of  
208 adjacent heteroduplex products (Danilowicz et al., 2017). To probe the importance of these molecular  
209 events, we increased  $D_{\text{init}}$  from 15 bp to 66 bp because  $D_{\text{init}}$  is equal to the number of bases that must be  
210 synthesized to traverse the homoduplex dsDNA so it becomes fully separated at the 3' end of the  
211 initiating strand. If strand displacement synthesis by a DNA polymerase is rapid enough to reach the  
212 3p end of the dDNA when  $D_{\text{init}} = 15$ , but not rapid enough to reach the end when  $D_{\text{init}} = 66$ , then  
213 comparison of results from experiments with the two different  $D_{\text{init}}$  values may provide insight into the  
214 influence of homoduplex dsDNA adjacent to the three strand heteroduplex products.

215 The same dsDNA with  $D_{\text{label}} = 58$  bp was used in all of the experiments illustrated in Figure  
216 4a, and  $N$  was controlled by varying the 98-nt sequence of the initiating strands. For this construct,  
217 even for  $N = 82$ , we see no increase in fluorescence in the absence of DNA synthesis. The raw  
218 fluorescence curves obtained with dATP-ssDNA-RecA filaments, DNA Pol IV, and dNTPs are shown  
219 in Figure 4- figure supplement 1, and Figure 4b shows the graphic representation of the corresponding  
220 change in fluorescence,  $\Delta\Delta F$  vs time curves, where  $\Delta\Delta F$  is the difference between the observed  
221 fluorescence and the fluorescence for  $N = 5$  at each time. In the figure, the purple, red, and black  
222 curves represent results for  $N = 82$ , 50, and 20, respectively. As shown in Figure 4- figure supplement  
223 1, the increase in fluorescence is only statistically significant if  $N > \sim 50$ . Figure 4- figure supplement 2  
224 shows analogous results for ATP-ssDNA-RecA filaments, LF-Bsu, and dNTPs. Comparison of Figure  
225 3b ( $D_{\text{init}} = 15$ ,  $\Delta L = 5$ ), Figure 3- figure supplement 2 ( $D_{\text{init}} = 15$ ,  $\Delta L = 15$ ), and Figure 4b ( $D_{\text{init}} = 66$ ,  
226  $\Delta L = 8$ ), indicates that adjacent homoduplex regions destabilize heteroduplex products even in systems  
227 that include DNA synthesis.

### 228 **Synthesis triggered by two filaments stabilizes recombination products**

229 As illustrated in Figure 1, if each of the filaments triggers DNA synthesis that completes a  
230 double strand, then no unpaired bases will remain. To study synthesis triggered by the initiating  
231 ssDNA formed at both sides of a DSB, we performed the experiments illustrated in Figure 4c. All of  
232 the experiments illustrated in Figure 4c included one filament with  $N_1 = 42$  contiguous bases that are  
233 homologous to the corresponding bases in the dsDNA. The sequence of the second filament was  
234 varied so that  $N_2$ , the number of contiguous bases that are homologous to the corresponding bases in  
235 the other strand of the dsDNA, varied from 0 to 82 bases. The  $\Delta\Delta F$  results shown in Figure 4d,  
236 analogous to results shown in Figure 4b, indicate that the fluorescence change for  $N_2 = 50$  is quite  
237 significant, even though no detectable fluorescence change was observed in one-filament experiments  
238 with  $N = 50$  (Figure 4b); therefore, a second filament with  $N_1 = 42$  significantly increased the  
239 fluorescence shift observed for filaments with 50 contiguous homologous bp. Thus, comparison of  
240 Figure 4b and 4d indicates that a second initiating ssDNA significantly increases the probability that  
241 the outgoing and complementary strands will be separated in the region between the filaments. This  
242 must be the result of a cooperative interaction between the two filaments because the signal due to  
243 either individually was negligible.

244 This cooperative increase in product stability is consistent with both filaments triggering  
245 synthesis within the dsDNA region containing the labels, resulting in both the fluorescein and  
246 rhodamine labels being incorporated in different dsDNA strands. As a result, the restoration of  
247 quenching is less likely than it would be if one of the labeled strands remains unpaired and available to  
248 pair again with its original partner (Rosselli and Stasiak, 1990, Danilowicz et al., 2017). Figure 4-  
249 figure supplement 2 shows that when synthesis is performed by LF-Bsu, the presence of a second  
250 filament with  $N_1 = 42$  significantly enhances  $\Delta\Delta F$ , if  $N_2$  is at least 20 bp even though Pol IV required  
251  $N_2 = 50$  bp. The difference in the required  $N_2$  values for the two polymerases may reflect the more  
252 efficient strand displacement synthesis provided by LF-Bsu. Furthermore, even for the case where  $N_2$   
253 = 82 bp, the results for DNA polymerase Pol IV that are shown in Figure 4d are  $\sim 4x$  smaller than the  
254 fluorescent values for LF-Bsu that are shown in Figure 4- figure supplement 2. The much smaller  
255 fluorescent values obtained for DNA polymerase Pol IV suggest that product formation in this case is  
256 low.

257 As shown in Figure 2e and 2f, if the system followed the RecBCD pathway, the separation  
258 between the 3' ends of the filaments will be much longer than the 16 bp separation used in these  
259 experiments. Thus, *in vivo*, formation of irreversible products triggered by initiating strands with  $\sim 40$   
260 bp  $N_1$  and  $N_2$  is probably much smaller than the low product formation shown in Figure 4d because *in*  
261 *vivo* the separation between the 3' ends of the two filaments is so much longer than 16 bp; however,  
262 comparison of Figure 4b, d does show that product stability can increase greatly if both initiating  
263 strands trigger synthesis that creates regions in which all of the DNA strands are base paired.

264 For the experiments shown in Figures 3b, c, 4b, d, Figure 3- figure supplement 2, and Figure 4-  
265 figure supplement 1 and 2, the  $N$  contiguous homologous bases are positioned at the 3' end of the  
266 filament, but we also wanted to explore cases in which  $M_3$  mismatches separated the  $N$  sequence  
267 matched bases from the 3' end of the filament. We performed  $M_3 > 0$  experiments to determine  
268 whether pairings between long repeats that are distant from the 3' end of the filament could trigger

269 genomic rearrangement since *in vivo* heterologous dsDNA always surrounds sequence matched  
270 heteroduplex products formed by joining different copies of long repeats.

271 Like eukaryotic recombinases, RecA can create strand exchange products that include some  
272 mismatches (Volodin et al., 2009, Sagi et al., 2006). However, there is also evidence indicating that  
273 the efficiency of strand exchange decreases in the presence of mismatches (Danilowicz et al., 2015, Qi  
274 et al., 2015). Thus, extension of the heteroduplex to the 3' end of the filament may become  
275 increasingly improbable as the number of mismatches at the 3' end of the filament increases. Since  
276 DNA synthesis triggered by strand exchange extends the initiating strand using the complementary  
277 strand as a template (Pomerantz et al., 2013), the synthesis requires the DNA polymerase to interact  
278 with the heteroduplex and the 3' OH at the end of the initiating strand. Thus, DNA synthesis is likely  
279 improbable if the heteroduplex product rarely incorporates the mismatched bases at the 3' end of the  
280 filaments.

### 281 **Synthesis is blocked by mismatches at the 3' ends of ssDNA**

282  
283 To test whether mismatches at the 3' end of the filament can inhibit the DNA synthesis  
284 required to make recombination irreversible, we designed experiments to study how  $M_{3'}$ , the number  
285 of mismatches at the 3' end of the filament, influences the interaction between the strand exchange  
286 product and the DNA polymerase. The experiments are illustrated schematically in Figure 5a. Figure  
287 5b shows the  $\Delta F$  curve obtained in the presence of DNA Pol IV and indicates that even  $M_{3'} = 3$   
288 strongly suppresses the fluorescence increase, suggesting no strand separation due to DNA synthesis.  
289 Furthermore, the result for  $M_{3'} = 5$  is indistinguishable from the results for heterologous controls.  
290 Analogous results obtained in the presence of LF-Bsu show that even  $M_{3'} = 3$  (Figure 5c) is  
291 indistinguishable from the heterologous controls (Figure 5- figure supplement 1). Additional  
292 experiments were performed with  $N = 82$  and the construct illustrated in Figure 4a. Figure 5- figure  
293 supplement 2 shows results for experiments with  $N = 82$  and either  $M_{3'} = 0$  or  $M_{3'} = 8$ . Controls with  
294  $M_{3'} = 0$  and either  $N = 5$  or  $N = 0$  are also shown; results for  $N = 82$  and  $M_{3'} = 8$  are indistinguishable  
295 from the heterologous controls. For that system, lower  $M_{3'}$  values were not tested.

### 296 **Chi sites rarely occupy the 3' ends of long repeats**

297 We will refer to the sequence provided by the genome database as the “given” strand. The  
298 other strand in the genome is complementary to the given strand, so we refer to that strand as the  
299 “comp” strand. In the RecBCD pathway, as indicated in Figure 1aiv, one initiating ssDNA will  
300 terminate with a Chi site from the given strand and the other initiating ssDNA will terminate with a  
301 Chi site from the comp strand.

302 Figure 6 displays graphical information designed to highlight the positions of Chi sites in long  
303 repeats and the decrease in repeat length due to RecBCD. In particular, Figure 6 a, b shows all of the  
304 repeated sequences in *E. coli* O157 that are longer than 20 bp and include at least one Chi site. The  
305 total height of the bars in Figure 6 a, b represents  $N_{\text{repeat}}$ , the total length of the repeat. No repeat  
306 includes a Chi site on both strands, so we have separated the results according to the strand in which  
307 the Chi sites appear. The upper end of each bar corresponds to the 3' end of the strand. An expanded  
308 view of these figures is shown in Figure 6- figure supplement 1.



309 Each bar is divided into colored regions that represent the relationship between that region and  
310 the 3' end of Chi sites. The yellow regions indicate portions of the repeats that are on the 3' side of all  
311 of the Chi sites in the repeat, so the yellow regions do not participate in any homology search. The  
312 separation between the 5' end of the repeat and the 3' end of the nearest Chi site is shown in dark blue  
313 and red, for the given and comp strands, respectively. These regions would participate in the  
314 homology search if RecBCD recognizes the Chi site nearest the 5' end. Though no comp strand repeat  
315 in this genome contains more than one Chi site, seven repeats in the given strand contain two Chi sites.  
316 The cyan bar shows the separation between the two Chi sites.

317 Figure 6c shows analogous results averaged over both strands in four *E. coli* genomes,  
318 restricted to cases where the 5' end of the repeat is separated from the 3' end of the nearest Chi by > 60  
319 bp. In Figure 6c, the green regions indicate the number of bp on the 3' side of all Chi sites, and the  
320 dark green regions are analogous to the red and dark blue regions in Figure 6 a, b. Light green  
321 indicates regions between two Chi sites in the same repeat. No repeat contained more than two Chi  
322 sites. The figure shows that for repeats with lengths >~1000 bp, the positioning of the Chi sites within  
323 the repeats allows RecBCD to reduce the length of the repeat that participates in the homology search,  
324 which *in vivo* data suggests reduces rearrangements due to joining different copies of the repeat (Bi  
325 and Liu, 1994).

326 If Chi sites play a role in avoiding recombination due to interactions between long repeats, then  
327 one would expect that the number of Chi sites positioned in long repeats would be suppressed with  
328 respect to a system in which the Chi sites were randomly positioned in the genome. To test this, we  
329 randomly positioned markers within each strand of real genomes, where the number of markers in  
330 each strand was equal to the number of Chi sites in that strand. The results shown in Figure 6d indicate  
331 that Chi sites positioning in long repeats is strongly suppressed. The detailed data for each genome are  
332 shown in Supplementary Table 1.

333 In calculating the results in Figure 6, we only considered repeats that included at least 20 bp on  
334 the 5' side of the Chi site, which would be the interaction if all of the bases in the Chi site were  
335 degraded. We note that the results shown in Figure 6 are not significantly altered if Chi site occupies  
336 the 3' end of the filament since allowing the Chi site to remain only adds one new repeat pair to the  
337 comp strand and adds one additional occurrence to two 20 bp sequences that were already repeated  
338 twice.

### 339 **The fraction of DSB creating filaments ending in long repeats**

340 As shown in Figure 1b, in the hypothetical DSB repair mechanism, the sequences at the 3' ends  
341 of the filaments flank the DSB, so the filament sequences uniquely specify the position of the DSB  
342 that created the filaments. In contrast, as shown in Figure 1a, if the RecBCD pathway is followed, the  
343 same sequences at the 3' ends of the filaments can result from any DSB positioned between Chi sites  
344 on the 3' ends of the two filaments (i.e.  $L_{\text{chi}}$ ). Thus, the effectiveness of the RecBCD pathway in  
345 reducing genomic recombination cannot be determined by simply considering how many Chi sites  
346 have repeated sequences at the 5' side.

347 Additional information can be gained by considering all of the possible DSB positions in the  
348 genome and determine what fraction of them lead to initiating ssDNA with long repeated sequences at

349 their 3' ends. Importantly, no long repeated sequence that appears on the 5' side of a Chi site appears  
350 elsewhere in the genome without the adjacent 8 bp Chi site. Thus, if even all of the Chi site bases are  
351 degraded before the searching filament is formed, in the RecBCD pathway genomic rearrangement  
352 can only occur by joining long repeats that occupy the 5' side of a Chi site. For these calculations, we  
353 assumed that DSBs are distributed randomly on the genome and that the function of RecBCD is  
354 changed by the first Chi site it encounters. Given these assumptions, we calculated the fraction of the  
355 DSBs that create initiating strands whose 3' ends terminate in at least one repeat containing  $N_{\text{rep } 3'} > n$   
356 bases on a specified initiating strand ( $\text{DSB1}_{\text{frac}}(n)$ ) or on both initiating strands ( $\text{DSB2}_{\text{frac}}(n)$ ).

357 Figure 7a shows the results for the RecBCD pathway. To calculate the results, we first  
358 computed  $\text{DSB1}_{\text{frac}}(n)$  for each strand in each of 12 enteric bacteria that have the same Chi site  
359 sequence (5'-GCTGGTGG-3')<sup>41</sup>. We then averaged the results for each strand over all of the 12  
360 bacteria to get the average probabilities for each strand. The red and blue lines in Figure 7a show  
361  $\text{DSB1}_{\text{frac}}(n)$  for the given and comp strands, respectively. They represent the probability that a DSB  
362 will lead to the formation of a filament from each strand with  $N_{\text{rep } 3'}$  exceeding the x-axis value. The  
363 black line shows the sum of the two probabilities. The graph indicates that ~ 2 % of all DSB would  
364 create at least one filament with a repeat on its 3' end that could pass a 300 bp homology test. This  
365 suggests that substantial genomic rearrangement could occur if only one filament was required to pass  
366 the homology test; however, strand exchange products remain reversible (Rosselli and Stasiak, 1990 ,  
367 Danilowicz et al., 2017) unless two complete dsDNA strands are formed. Formation of two complete  
368 dsDNA requires that both searching filaments trigger synthesis. If a DSB forms within a repeat, major  
369 genomic rearrangement will result if both searching filaments pair with another copy of that repeat.

370 Thus, we considered  $\text{DSB2}_{\text{frac}}(n)$ , and found that no genome contained a repeat that could  
371 create  $N_{\text{rep } 3'} > 20$  bases on both initiating strands, as indicated by the orange line that lies along the x-  
372 axis in Figure 7a-c. For *E. coli* O157, we also considered the 8 cases in which different copies of a  
373 repeat contained Chi sites on opposite strands; however, in all cases those two Chi sites were separated  
374 by more than 15 Chi sites on either strand, so given the 30 % probability of recognizing a Chi site, it is  
375 enormously unlikely one DSB would produce two filaments terminating in those Chi sites.

376 Figure 7b, c highlights some advantages of the RecBCD pathway by comparing the results  
377 shown in Figure 7a to the results for the hypothetical DSB ends mechanism. The black and orange  
378 lines in Figure 7b, c are the same as those in Figure 7a, but Figure 7b, c also shows green and magenta  
379 curves representing the analogous results for the hypothetical DSB ends mechanism. The difference  
380 between the green and black curves provides some information about the influence of Chi sites on  
381 genomic rearrangement as a result of suppression of  $\text{DSB1}_{\text{frac}}(n)$ , but rearrangement probabilities are  
382 also influenced by the number of times a repeat occurs in the genome and the physical distance  
383 between the repeat at the end of the filament and other copies of the repeat, where that distance may  
384 change with time.

385 Fortunately, the difference between the magenta and orange is much easier to interpret  
386 because the orange line indicates that if the RecBCD pathway is followed no DSB would create two  
387 filaments that would include regions of the same repeat. In contrast, in the DSB ends pathway many  
388 do. Importantly, Figure 6d shows that summing over the results for all 12 genomes yielded > 20  
389 instances in which two Chi sites on the same strand occur in one repeat. That statistic predicts that

390 summing over the same genomes should yield  $\sim 20$  repeats that could create  $N_{\text{rep } 3'} > 20$  bases on both  
391 initiating strands; however, the actual sum was zero; consequently, for the RecBCD pathway the  
392 suppression of  $\text{DSB2}_{\text{frac}}(n)$  is not the result of the observed reduction of instances in which Chi sites  
393 occupy one strand on a repeat. Thus, the statistical distribution of Chi sites in the genomes of enteric  
394 bacteria suggests that strong suppression of  $\text{DSB2}_{\text{frac}}$  is much more important than preventing Chi sites  
395 from occupying one strand in a repeat. This strong suppression avoids formation of searching filament  
396 pairs that include regions of the same long repeat at their 3' ends, so the strong statistical suppression  
397 supports our proposal that the placement of Chi sites allows the RecBCD pathway illustrated in Figure  
398 1a to strongly suppress genomic rearrangement; however, it is probable that in rare instances Chi sites  
399 may be associated with increased genomic recombination if the system does not follow the pathway  
400 shown in Figure 1a.

## 402 Discussion

403 In sum, it has been known for decades that homologous recombination in bacteria frequently  
404 occurs at Chi sites, which are significantly overrepresented ( $\sim 10x$  random probability) in bacterial  
405 genomes; however, the benefits conferred by Chi sites had remained elusive. In this work, we have  
406 presented experimental and theoretical evidence for an elegant mechanism that exploits the sequence  
407 distributions near Chi sites to suppress genomic rearrangements that would otherwise be both frequent  
408 and fatal. We note that eukaryotic genomes are longer and contain more long repeated sequences, so a  
409 “Chi site” system that includes only 8 bases might not be effective in longer genomes. Of course, it is  
410 possible that eukaryotes could use a similar system involving more than 8 bases, or 8 base sequences  
411 might provide some rejection if double strand break repair in eukaryotes was confined to domains that  
412 included only a few Mbp.

## 414 Methods and Materials

### 415 FRET measurements

416 Strand exchange reactions were performed by mixing an aliquot of  $0.06 \mu\text{M}$  98 nt ssDNA/RecA  
417 filament,  $0.06 \mu\text{M}$  labeled dsDNA, and  $1 \mu\text{M}$  *E. coli* DNA Polymerase IV (obtained using DinB  
418 overproducer plasmids (Tashjian et al., 2017, Cafarelli et al., 2013) or 5 units Bsu DNA polymerase,  
419 Large fragment (LF-Bsu) (New England Biolabs (NEB), 5000 units/ml) and rapidly transferring the  
420 solution to a quartz cuvette. For DNA Pol IV measurements, the RecA buffer contained  $0.1 \text{ mg/ml}$  BSA,  
421  $2 \text{ mM}$  dATP, and  $0.4 \text{ mM}$  dNTPs. Measurements in the presence of Bsu polymerase were performed in  
422 RecA buffer containing  $1 \text{ mM}$  ATP and  $0.1 \text{ mM}$  dNTPs.

423 The filaments were initially prepared by incubating  $0.06 \mu\text{M}$  ssDNA (final concentration  $\sim 6 \mu\text{M}$  in  
424 bases) with  $2 \mu\text{M}$  RecA (NEB) in the presence of  $1 \text{ mM}$  cofactor (ATP or dATP),  $10 \text{ U/ml}$  of pyruvate  
425 kinase,  $3 \text{ mM}$  phosphoenolpyruvate, and  $0.2 \mu\text{M}$  single-stranded binding protein (SSB) in RecA buffer  
426 ( $70 \text{ mM}$  Tris-HCl,  $10 \text{ mM}$   $\text{MgCl}_2$ , and  $5 \text{ mM}$  dithiothreitol, pH 7.6) at  $37^\circ\text{C}$  for 10 minutes.

427 FRET experiments followed the emission of the fluorescein label by using 493-nm excitation during 30  
428 minutes; the emission was read as counts per second (cps) at 518 nm every one second. The integration  
429 was 0.5 s and the band width 2 nm. The sample was kept at all times at  $37^\circ\text{C}$ .

430 The dsDNA containing 90 bp with internal labels was obtained by heating and cooling down slowly the  
431 corresponding oligonucleotides from 90 to 40°C with 1°C steps equilibrated for 1 minute; the emission  
432 at 518 nm was acquired (excitation at 493 nm) at each temperature step.

433 The dsDNA containing 180 bp was prepared by initially annealing a 90 nt ssDNA containing an internal  
434 rhodamine label on base 58 from the 5' end and a 5'-end phosphorylated oligonucleotide (82 bases)  
435 containing an internal fluorescein label (position 57 from the 3' end). Another dsDNA without labels  
436 was annealed using two oligonucleotides containing 90 and 98 bases; the former was 5'-end  
437 phosphorylated. Finally the two dsDNAs were annealed and ligated overnight at 16°C in the presence of  
438 T4 DNA ligase in ligase reaction buffer (50 mM Tris, 10 mM MgCl<sub>2</sub>, 1 mM ATP, and 10 mM  
439 dithiothreitol, pH 7.5, NEB). The 180 bp construct was further purified by running a 3 % agarose gel in  
440 TBE (Tris/Borate/EDTA) buffer for 2 hours (6 V/cm). The 180 bp band was visualized with a midrange  
441 UV trans-illuminator and cut. Finally the dsDNA was extracted from the agarose using a Nucleospin kit  
442 (Machery and Nagel, Bethlehem, PA) and concentrated on a YM-100 centrifugal filter (Millipore).

443 The sample containing 98 bp dsDNA was prepared by annealing the complementary oligonucleotides  
444 from 90 to 40°C with 1°C steps equilibrated for 1 minute; the emission at 518 nm was acquired  
445 (excitation at 493 nm) at each temperature step.

#### 446 **Oligonucleotides used for dsDNA preparations and filaments**

447 Oligonucleotides for dsDNA 90 bp with internal fluorophores: 5' CGG AAA TCA C/iRho-T/C CCG  
448 GGT ATA TGA AAG AGA CGA CCA CTG CCA GGG ACG AAA GTG CAA TGC GGC ATA CCT  
449 CAG TGG CGT GGA GTG CAG GTA 3' and 5' TAC CTG CAC TCC ACG CCA CTG AGG TAT  
450 GCC GCA TTG CAC TTT CGT CCC TGG CAG TGG TCG TCT CTT TCA TAT ACC CGG GAG  
451 /iFluor-T/GA TTT CCG 3'.

452 Oligonucleotides for filaments interacting with 90 bp dsDNA. 75 (-15) plus 23 heterologous: 5' GGACA  
453 CTGCTTCATTCTTATTACCTGCACTCCACG CCACTGAGGTATGCCGCATTG CACTTTC  
454 GTCCCTGGCAGTGGTTCG TCTCTTTCATATAACC 3'; 50 (-15) plus 48 heterologous: 5' GGACGCT  
455 GCCGGAT TCCTGTTGAGTTTATTGCT GCCGTCATTGCTTATATGCCGCAT TGCAC TTTCGT  
456 CCCTGGCAGTGGTCGTCTCTTTCATATAACC 3'; 36 (-15) plus 62 heterologous: 5' GGACGCTGCC  
457 GGATTCCCTG TTGAGTTTATTGCTGCCGTC ATTGCTTATTATGTTCA TCCCG TTTTCGTCCC  
458 TGGCAGTGGTCGTCTCTTTCATATAACC 3'; 20 (-15) plus 78 heterologous: 5' GGACGCT GCCGG  
459 ATTCCTGTTGAGTTTATTGCTGCCGTCATTGCTTATTATGTTTCATCCCGTCAACATTCAA  
460 ACGGCCGGTCGTCTCTTTCATATAACC 3'; 3 mismatches 3' end: 5' GGACGCTGCCGGATTCCCTG  
461 AGTATACCTGCACTCCACGCCACTGAGGTATGC CGCATTGC ACTTTCGTCCCTGGCAGT  
462 GGTCGTCTCTTTCATATTA -3'; 5 mismatches 3' end: 5' GGACGCTGCCGGATTCCCTCTGTATA  
463 CCTGCACTCCACGCCACTGAGGTATGCCGCATTGCACTTTCG TCCCTGGCAGTGGTCGTCT  
464 CTTTCATTCTAA 3'

#### 465 **Oligonucleotides for 180 bp dsDNA**

466 Annealed initially with labels: 82 nt (Flu57): 5'(K) CTCCACGCCACTGAGGTATGCCGCA/iFluorT/  
467 TGCATTTTCGTCCCTGGCAGTGGTCGTC TCTTTC ATATAACCCGGGAGTGATTTCCG 3' and 90  
468 nt (Rho58): 5' CGGAAATCACTCCCGG GTATATGA AAGAGACGACCACTGCCAGGGACGA  
469 AAGTGCAA/iRhoT/GCGGCATACCTCAG TGGGTGGAGTGCAGGTA 3'. Annealed initially (no  
470 labels): 90 nt: 5' (K)AATCCGGCAGCGTCCGTCGTTGTTGATATTGCTTATGAAGGCTCC

471 GGCAGTGGCGACTGGCGTACTGACGGA TTCAT CGTTGGGGTTCGGT 3' and 98 nt: 5'ACCGAC  
472 CCCAACGATGAATCCGTCAGTACGCCAG TCGCC ACTGCCGGAGCCTTCATAAG CAATA  
473 TCAACAACGACGGACGCTGCCGGATTTACCTGCA3'.

474 Oligonucleotides for filaments interacting with 180 bp dsDNA. 82(-8) plus 16 heterologous for N= 82:  
475 5'GACGCTG CCATATT CAAGTCGCCACTGCCGGAGCCTTCATAAGCAATATCAACAACG  
476 ACGGACGCTGCCGGATTTA CCTGCACTCCACGCCACTGAGG 3'; 50(-8) plus 48 heterologous  
477 for N= 50 5'ACGCTGCCATATTCAATCGTTCACCTTTATTGCTGGTGCATTGCTTGCTCA  
478 ACAACGACG GACGCTGCCGGATTTACCTGCACTCCACGCCACTG AGG 3'; 20(-8) plus 78  
479 heterologous for N= 20: 5'GGACGCTGCCTTATTCCTGTTGAGTTTATTGCTGCCGTCATT  
480 GCTTATTATGTTTCATCCCGTCA ACATTCAAACCTGTTTGCCTCCACGCCACTGAGG 3'; 5(-8)  
481 plus 93 heterologous for N= 5: 5'GGACGCTGCCTTATTCCT GTTGAGTTTATTGCTGCCGT  
482 CATTGCTTATTATGTTTCATCCCGTCAACATTCAAACCTGTTTCAGGGACGAATATGGTGAGG 3';  
483 8 heterologous 82 homologous plus 8 heterologous: 5'GACATTATAGTACGCCAGTCGCCACTGC  
484 CGGAGCCTTCATAAGCAATATCAACAACGACGG ACGCTG CCGGATTTACCTGCACTCC  
485 ACGCGCTGCCAT 3'; 42(-8) 56 heterologous for N= 42: 5'GGACGCTGCCTTATTCCTGTTGAG  
486 TTTATTGCTGCCGTCATTGCTTATTATGTTCAACT CCCGGGTATATGAAAGAGACGA  
487 CCACTGCCAGGGACGAA 3'; 98 nt Heterologous: 5'CGGAAAAGTGCATATCCAGCAGAA  
488 CATCATGAAAATAATGGGTACTGTAAAAGCGGTGCCAGTCGGCATACTCCGTGGATGACA  
489 TCCCGGCAAGCATG 3'.

490 Oligonucleotides annealed for 98 bp dsDNA and end labels: 5'/56-TAMN/CGGAAATCACTCCC  
491 GGGTATATGAA AGAGACGACCACTGCCAGGGACGAAAGTGCAATGCGGCATACCT  
492 CAGTGGCGTGGAG TGCAGGTATACAGATT 3' and 5' AATCTGTATACCTGCACTCCACGCCA  
493 CTGAGGTATGCCGCATTGCACTTTCGTCCCTGGCAGTGGTTCGTCTCTTTTCATATACCCGG  
494 GAGTGATTTCCG/36-FAM/ 3'.

495 Oligonucleotides for filaments interacting with 98 bp dsDNA. 83 (-15) plus 15 heterologous: 5'  
496 GGACGCTGCCGGA TTAATCTGTATACCTGCACTCCACGCCACTGAGG TATGCCGCATTGCA  
497 CT TTCGTCCCTGGCAGTGGTTCGTCTCTTTTCATATAACC 3'; 75 (-15) plus 23 heterologous: 5'  
498 GGACACTGCTTCATTCCCTCTTATTACCTGCACTCCACG CCACTGAGGTAT GCCGCATTG  
499 CACTTTCGTCCCTGGCAGTGGTTCGTCTCTTTTCATATAACC 3'; 50 (-15) plus 48 heterologous: 5'  
500 GGACGCTGCC GGATTCCTGTTGAGTTTATTGCTGC CGTCATTGCTTATATGCCGCATTGCA  
501 CTTTCGTCCCTGGCAGTGGTTCGTCTCTTTTCATATAACC 3'; 36 (-15) plus 62 heterologous: 5' GGA  
502 CGCTGCCGGATTCCTGTTGAGTTTATTGCTGCCGTC ATTGC TTATTATGTTTCATC CCGTTT  
503 TCGTCCCTGGCAGTGGTTCGTCTCTTTTCATATAACC 3'; 20 (-15) plus 78 heterologous: 5' GGACGC  
504 TGCCGGATTCCTGTTGAGTTTATTGCTG CCGTCATTGCTTATTATGTTTCATCCCGTCAACAT  
505 TCAAACGGCCGGTTCGTCTCTTTTCATATAACC 3'

## 506 **Analysis of genomes for repeated sequences and Chi sites**

### 507 **Genomes used**

508 *Escherichia coli* O157, *E. coli* O157 strain 644-PT8, *E. coli* strain RR1, *E. coli* O157:H7 strain  
509 FRIK2533, *Salmonella enterica* subsp. *arizonae* serovar 62:z4,z23:- strain RSK2980, *Salmonella*  
510 *enterica* subsp. *enterica* serovar *Anatum* str. CDC 06-0532 strain USDA-ARS-USMARC-1764,  
511 *Shigella boydii* strain ATCC 9210, *S. flexneri* 5 str. 8401, *Klebsiella pneumoniae* subsp. *pneumoniae*

512 strain TGH8, *K. pneumoniae* subsp. *pneumoniae* strain TGH10, *Proteus mirabilis* BB2000, and *Proteus*  
513 *mirabilis* strain AR\_005.

514 For each of the genomes, the given strand is the strand given by the database from which we obtained  
515 the sequence. The sequences for the given strands of DNA for *E. coli* genomes were acquired from  
516 PATRIC in FASTA format. They were converted to a simple .txt file with A, C, G, and T bases and read  
517 into Matlab as a single continuous string running from 5' to 3' called *bases*. The sequence of the comp  
518 strand is the complement of the given strand; however, if each base in the .txt file for the given strand is  
519 simply replaced by the complementary base, the resulting comp strand sequence runs from the 3' end to  
520 the 5' end. To get the comp strand sequence running from 5' to 3', the order of the bases in the comp  
521 strand must be reversed.

## 522

### 523 **Repeated sequences in whole genomes**

524 To find all repeated sequences within the whole genome, 20 bp was established as an important cutoff  
525 length, and all the starting positions in which each consecutive sequence of 20 bp occurred were mapped  
526 within the genome. Sequences and their starting locations that were repeated were selected and placed in  
527 a smaller map "*g\_rep*". Due to the overlap of these 20 bp keys, repeated sequences longer than 20 bp  
528 would register more than one key within "*g\_rep*". In order to determine the true starting positions of  
529 repeated sequences, the multiple starting positions associated to a particular 20 bp sequence were  
530 retrieved, but isolated from groupings of starting positions of other 20 bps sequences. A comparison list  
531 "*complist*" was generated to choose all the comparisons within each group. For a 20 bp sequence with  
532 only two starting positions, there was only one comparison. But for sequences with *n* starting positions,  
533 there were  $C(n,2)$  (*n* choose 2) comparisons to be made. All comparisons were made against an  
534 arbitrarily large genome section of 10,000-20,000 bp on either side of the starting position for the two  
535 sequences being compared. The first mismatch in either direction was found and its distance to the  
536 starting position as well as its absolute location in "*bases*" was recorded. If there were conflicts between  
537 two comparisons within the same group, indicating that at least one sequence in the group was a  
538 subsequence of the others, the maximum distance was chosen only for the sequences where the conflict  
539 occurred. Therefore, not all sequences within a particular grouping necessarily have the same distance.  
540 In the resulting array of start and end position pairs, all repeats were discarded, as these are a remnant of  
541 the over-counting from the original selection of positions. The unique start and end positions represent  
542 the starting and ending positions of all sequences  $\geq 20$  bp in the whole genome that occur more than  
543 once. From this, the length of homology is easily calculated for each particular sequence, and start,  
544 difference, and end information was succinctly summarized in array "*start\_difference\_end*".

### 545 **Chi sites**

546 Using MatLab's built in function to find the location of substrings, the starting indexes of all the Chi  
547 sites (5'-GCTGGTGG-3') (Smith et al., 1981) on the given strand going from 5' to 3' were found.  
548 Similarly, positions for the reverse complements of the Chi sites were also found to represent the  
549 position of Chi sites on the complementary strand, which was not read into MatLab and therefore not  
550 directly searched.

### 551 **Probability mass function for $L_{chi}$**

552 For each position in "*bases*", the distance to the nearest Chi sites in both directions was calculated using  
553 a "*loopindex*" function. The distances were summed for each position. Using MatLab's default  
554 "*histogram*" function with bin sizes of 5,000 bp, the results were acquired for each *E. coli* genome. The  
555 bin counts for each were averaged and normalized to represent the case in which the position of the DSB  
556 is assumed to be random and RecBCD is assumed to recognize Chi sites with 100% accuracy. For the  
557 case where RecBCD only has an  $\sim 30\%$  chance of recognizing a Chi site, the DSB position was still  
558 assumed to be random, but the number of Chi sites skipped for each break was generated using a first  
559 success distribution in MatLab:

$$560 \text{ PDF: } P(X=k)=p*(1-p)^{(k-1)}$$
$$561 \text{ E}(X)=1+(1-p)/p$$

562 where  $X$  is the random variable denoting the number of Chi sites up to and including the recognized Chi  
563 site,  $p$  is the probability that a particular chi site is recognized, and  $E(X)$  is the expectation value for the  
564 random variable with a given  $p$ . Adjusted distances for each position were then calculated and a new  
565 histogram with bin size 10,000 was generated for each *E. coli* genome. The individual bin counts were  
566 averaged for the four genomes and normalized.

### 567 **Repeats adjacent to Chi sites**

568 A method similar to the one used for  $N_{\text{repeat}}$  was used to find repeats  $\geq 20$  bp adjacent to a Chi site that  
569 would remain as part of the searching filament ( $N_{\text{rep } 3'}$ ). For Chi sites on the given strand, the 20 bp to the  
570 5' end of the start location of the Chi site in “bases” was selected as the key; for Chi sites on the comp  
571 strand, the complement of the 20 bp to the 3' end of the comp Chi site on the given strand was selected  
572 as the key. Those are the 20 bp on the 5' side of the Chi site on the comp strand. For each type of Chi, a  
573 particular sequence key was mapped to the starting position(s) of the associated Chi site(s). We did not  
574 consider interactions between sequences in the given strand and sequences in the complementary strand.  
575 Thus, the four possible interactions  $x_{\text{given\_pos}}$ ,  $x_{\text{given\_rep}}$ ,  $x_{\text{comp\_pos}}$ , and  $x_{\text{comp\_rep}}$  mapped unique  
576 and repeated sequences to their associated Chi sites for each Chi type.

577 The actual lengths of the repeats were found in a way similar to the lengths of repeats found in the entire  
578 genome. The result was a table of starting positions of Chi sites with  $N_{\text{rep } 3'} \geq 20$  bp and the actual  
579 length of homology to either side of the starting position of the Chi site.

### 580 **Distances between repeat adjacent and nearest Chi sites**

581 For each Chi site whose  $N_{\text{rep } 3'} \geq 20$ , the distance to the nearest Chi site of the same type in the  
582 direction of strand exchange progression was found. The next Chi site in the sorted list was selected, and  
583 its difference was calculated. This distance represents the number of positions where, if a DSB were to  
584 occur, that Chi site would be first encountered by RecBCD in the RecBCD pathway. Dividing this  
585 number by the number of bp in the genome gives the fraction of the genome that would result in that  
586 particular searcher if DSB occurred randomly and RecBCD was 100 % accurate in identifying a Chi  
587 site.

### 588 **Fraction of genome that gives Chi and WG searcher**

589 Selecting for repeat length greater than or equal to  $N = [0, 100, 200 \dots 16000]$ , the fractions were found  
590 and summed over all Chi sites of one type as well as overall. The results were displayed using MatLab's  
591 *plot* function. Similar fractions were calculated for whole genome (WG) repeats where one or both sides  
592 of the remaining sequence are required to be  $N$ . Sequences of at least  $N$  were found. Subtracting each by  
593  $N$ , multiplying by 2, and summing together gave the raw number of positions that resulted in at least one  
594 side having the requisite number of homology. Taking the same sequence of at least  $N$ , subtracting  $2*N$   
595 from each (choosing the max of the result or 0), and summing over all gives the raw number of positions  
596 that results in both sides. Dividing the raw number by the number of bases gives the fraction.

| <b>Abbreviation</b>     | <b>Meaning</b>                                                                                                                                                            |
|-------------------------|---------------------------------------------------------------------------------------------------------------------------------------------------------------------------|
| 3p end                  | The end of the dsDNA that would be reached by synthesis initiated by RecA mediated recombination at the 3' end of the initiating ssDNA                                    |
| $\Delta F$              | The change in fluorescence with time                                                                                                                                      |
| $\Delta\Delta F$        | The difference between $\Delta F$ for the positive and the $\Delta F$ for a control with N=20                                                                             |
| $\Delta L$              | The separation between the fluorescent labels and the 3' end of the initiating ssDNA                                                                                      |
| $D_{\text{label}}$      | The separation between the fluorescent labels and the 3p end of the dsDNA                                                                                                 |
| $D_{\text{init}}$       | The separation between the 3' end of the initiating ssDNA and the 3p end of the dsDNA                                                                                     |
| $DSB1_{\text{frac}}(n)$ | The fraction of the DSBs that creates initiating strands with $N_{\text{rep } 3'} > n$ on a specified initiating strand.                                                  |
| $DSB2_{\text{frac}}(n)$ | The fraction of the DSBs that creates initiating strands with $N_{\text{rep } 3'} > n$ on both initiating strands                                                         |
| $L_{\text{Chi}}$        | The number of bases surrounding the DSB that are not incorporated in the searching filaments because they are removed by RecBCD.                                          |
| $L_{\text{prod}}$       | The length of a heteroduplex product joining the initiating and complementary strands                                                                                     |
| $M_{3'}$                | The number of contiguous mismatched bp at the 3' end of the initiating ssDNA                                                                                              |
| N                       | The number of contiguous bp in the dsDNA that are sequence matched to bases in the initiating ssDNA in experiments with only one initiating ssDNA                         |
| $N_1$                   | The number of contiguous bp in the dsDNA that are sequence-matched to bases in one of the initiating ssDNA in experiments with two initiating ssDNAs                      |
| $N_2$                   | The number of contiguous bp in the dsDNA that are sequence matched to bases in the other of the initiating ssDNA in experiments with two initiating ssDNA                 |
| $N_{\text{repeat}}$     | The length of a repeated sequence occurring anywhere in the genome                                                                                                        |
| $N_{\text{rep } 3'}$    | The length of a repeated sequence that is positioned on the 5' side of a Chi site. In the RecBCD pathway, these repeats would occur at the 3' end of searching filaments. |

601

602 **Table 1 Abbreviations used in the text.**

603

604



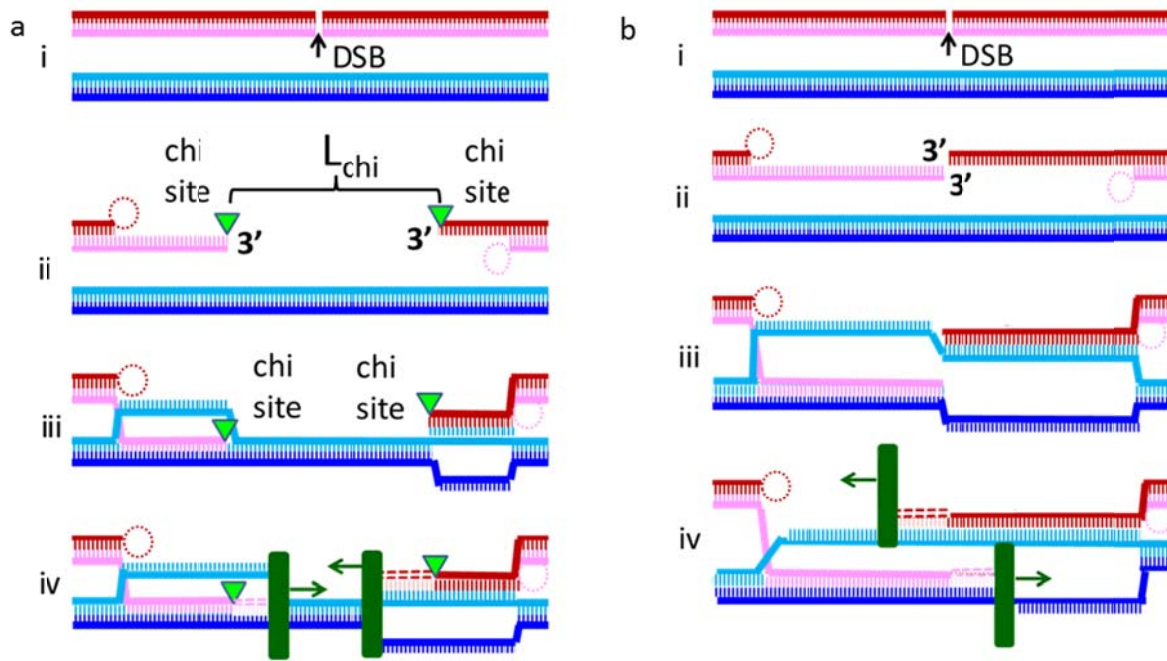

605

606

607

608

609

610

611

612

613

614

615

616

617

618

619

620

621

622

**Figure 1. Model of the RecBCD-dependent and hypothetical DSB ends repair pathways. a** Schematic of the RecBCD dependent DSB repair pathway. i. The dsDNA sequences are identical, but the dsDNA molecule with red and pink strands contains a double strand break indicated by the black arrow and labeled DSB. ii. RecBCD creates ssDNA with Chi sites (indicated by green triangles) at their 3' ends, while the complementary strands are degraded or looped (dotted circles) creating an  $L_{Chi}$  bp gap. iii. RecA mediated strand exchange creates heteroduplex products that reach the 3' ends of the filaments. iv. DNA polymerase (dark green rectangles) extends both initiating ssDNAs by copying the complementary strands beginning at the 3' ends of an initiating strand in a RecA filament. This process is only irreversible once there are no unmatched bases between the initiating filament and the complementary strand. **b** Schematic for a hypothetical DSB break repair mechanism that is similar to (a) except the 3' ends of the DSB form the 3' ends of the searching filament and RecBCD does not participate. We compare results from this mechanism to results from the RecBCD pathway to determine whether removing  $L_{Chi}$  between the 3' ends of the filament and positioning Chi sites at the 3' ends of the searching ssDNA filaments allows the RecBCD pathway to suppress genomic rearrangement due to pairing between different copies of long repeated sequences.

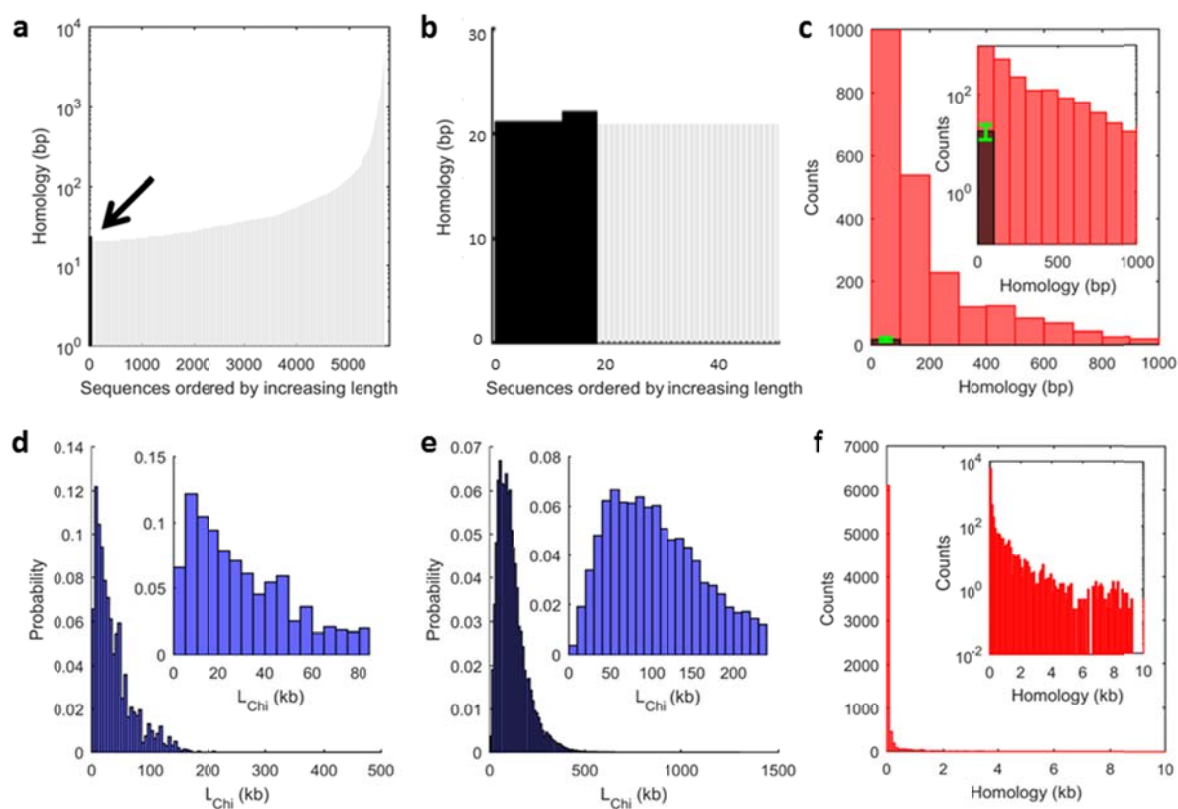

623

624 **Figure 2. Prevalence of long repeats in bacterial genomes suggests rearrangements would be likely**  
 625 **without RecBCD intervention.** **a** Every repeated sequence in *E. coli* O157 with a length  $N_{\text{repeat}} > 20$  is  
 626 indicated by a gray line. The height of the line corresponds to the length of the repeat. The black line  
 627 indicated by the arrow shows a typical result for a sequence of the same length whose bases were  
 628 randomly chosen. **b** Same as **(a)** but with an expanded x-axis. For the 100 random sequences (about 5  
 629 Mb long) considered, the minimum and maximum number of repeats was 4 and 30, respectively. Mean  
 630 = 17.6, mode = 18, and the longest repeat was 25 bp long. **c** The red bars in the histogram represents  
 631 repeats between  $20 < N_{\text{repeat}} < 1000$  bp averaged over the four *E. coli* genomes using a 100 bp bin width.  
 632 The dark bar shows the average of the results obtained for the 100 random sequences (about 5 Mb long).  
 633 The green error bar shows the standard deviation for the 100 random sequences. Inset: same data using a  
 634 logarithmic y-axis. **d** Probability distribution for  $L_{\text{Chi}}$  averaged over four *E. coli* genomes assuming 100  
 635 % Chi site recognition and using a 5 kb bin width. Inset: same data with an expanded x-axis. **e** Same as  
 636 **(d)** but assuming 30 % Chi site recognition and using a 10 kb bin width. **f** Histogram of  $N_{\text{repeat}}$  averaged  
 637 for the four *E. coli* genomes using a 100 bp bin width. The 10 kb maximum x-axis value corresponds to  
 638 the bin width in **(e)**. Inset: same as **(f)** but with a logarithmic y-axis showing that 8 % of repeats have  
 639 lengths  $> 300$  bp, and 4 % have lengths  $> 1$  kb, whereas no repeat extends more than 9.5 kb.

640

641

642

643

644

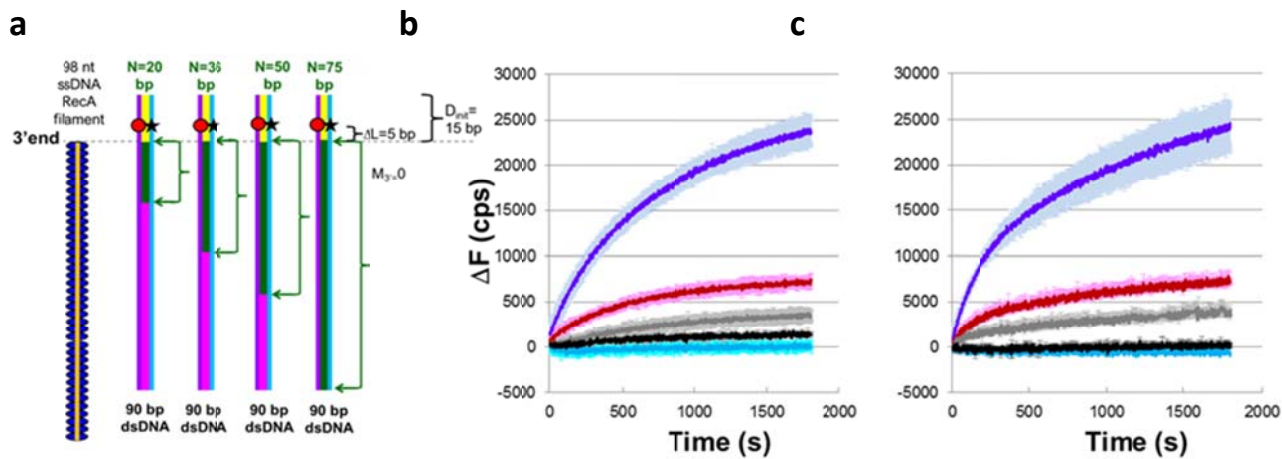

645

**Figure 3. DNA synthesis stabilizes DSB repair occurring at a repeat.** **a** Experimental schematic showing a typical ssDNA-RecA filament (orange line with blue ellipses) and dsDNA.  $\Delta L = D_{label} - D_{init} = 5$  bp. The labeled dsDNA used in all of the experiments was the same, so each N value corresponds to a different filament sequence. For each N value, the green arrows highlight the green regions of the dsDNA that are homologous to the N bases at the 3' end of the ssDNA. The other bases in the dsDNA are heterologous to the initiating ssDNA. The yellow region indicates  $D_{init} = 15$  bp. The remaining dsDNA is shown in magenta. The red circle and black star represent the rhodamine and fluorescein labels, respectively. They are positioned on the complementary (purple line) and outgoing (blue line) strands, respectively. **b** Graph representing the average over three trials of the change in fluorescence ( $\Delta F$ ) vs. time curves in experiments with dATP-ssDNA-RecA filaments and DNA Pol IV represented in **(a)** for N = 75 (dark blue), 50 (red), 36 (gray), 20 (black), and heterologous filament (light blue).  $\Delta F$  in counts per second (cps) is calculated as the difference between the measured fluorescence and the average initial fluorescence for heterologous dsDNA. The error bars show the standard deviation based on three trials. **c** Same as **(b)** in the presence of ATP-ssDNA-RecA filaments and LF-Bsu polymerase.

660

661

662

663

664

665

666

667

668

669

670

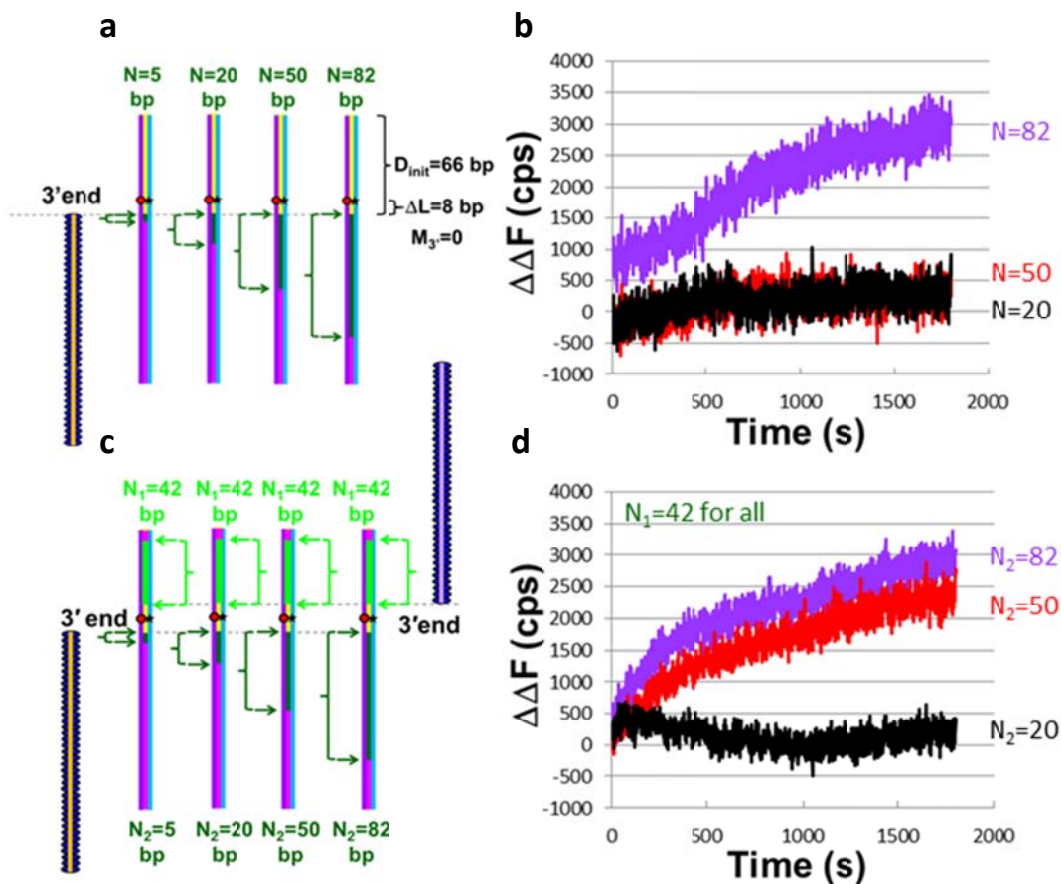

671

672

673

674

675

676

677

678

679

680

681

682

683

684

685

**Figure 4. The presence of a second filament rescues instability caused by an ssDNA outgoing strand and a long homoduplex dsDNA that extends beyond the 3' end of a filament.** **a** Schematic of experiments with 66 bp of homoduplex dsDNA on the 3' end of the filament and N values of 5, 20, 50, and 82 bp. **b** Graphic representation of the change in fluorescence ( $\Delta\Delta F$ ) vs. time curves of the experiment represented in (a) with dATP-ssDNA-RecA filaments and DNA Pol IV.  $\Delta\Delta F$  is calculated as the difference between the measured fluorescence and the fluorescence for  $N = 5$ . The black, red, and purple curves correspond to  $N = 20$ , 50, and 82, respectively. **c** Schematic for experiments performed involving two filaments. In all of these experiments  $N_1 = 42$ . **d** Graphic representation of the change in fluorescence  $\Delta\Delta F$  vs. time curves for single trials of the experiment represented in c with dATP-ssDNA-RecA filaments and DNA Pol IV.  $\Delta\Delta F$  was calculated as indicated above. Different  $N_2$  values are represented with different curve colors, where purple, red, and black correspond to  $N_2 = 82$ , 50, and 20 nt, respectively.

686

687

688

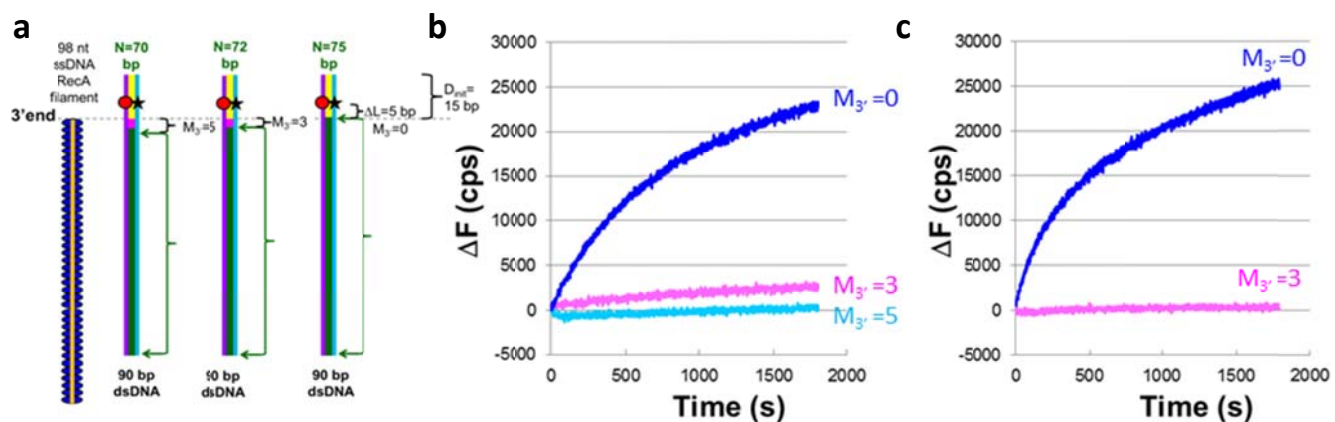

689

690 **Figure 5. DNA synthesis is required for a DNA Pol to stabilize strand exchange products. a**  
691 Schematic for experiments with M<sub>3'</sub> values of 0, 3, 5. **b** Graphic representation of the change in  
692 fluorescence (ΔF) vs. time curves from single trial experiments performed with dATP-ssDNA-RecA  
693 filaments and DNA Pol IV in which the blue, pink, and light-blue curves correspond to M<sub>3'</sub> values of 0,  
694 3, and 5 base mismatches, respectively. ΔF is calculated as the difference between the measured  
695 fluorescence and the average initial fluorescence for heterologous dsDNA. **c** Analogous experiments as  
696 (b) but with LF-Bsu polymerase instead of DNA Pol IV.

697

698

699

700

701

702

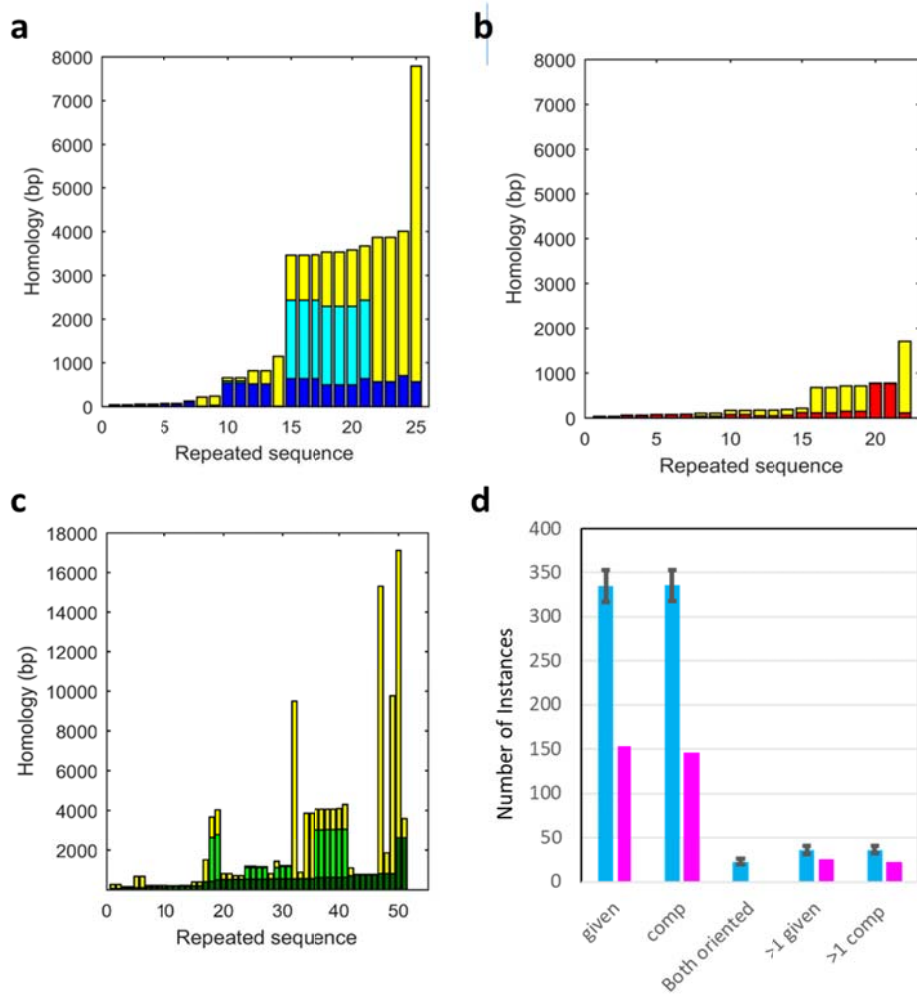

703

704 **Figure 6. Chi sites in *E. coli* O157 are rarely located at the 3' end of long repeated sequences.**

705 Same as Figure 2a but showing only repeats in the given strand that include a Chi site. The total height

706 of the bar corresponds to the total length of the repeat. The height of the yellow regions corresponds to

707 the region that would be always degraded by RecBCD. The height of dark blue regions corresponds to

708 the separation between the 5' end of the repeat and the 3' end of the nearest Chi site in the repeat. For

709 repeats that contain two Chi sites, the region between the Chi sites is shown in cyan. No repeat includes

710 more than two Chi sites. **b** Same as **(a)**; analogous data for the comp strand with regions on the 5' side of

711 the Chi site shown in red. **c** Filaments including repeats > 60 bp summed over both strands in 4 *E. coli*

712 genomes. The dark green regions show the separation between the 5' end of the repeat and the nearest

713 Chi site. The light green regions indicate the spacing between Chi sites. **d** The height of the magenta

714 bars indicates the number of Chi sites in repeats > 20 bp, and the blue bars represent the corresponding

715 results for markers randomly positioned in the genome, where the number of markers/strand is equal to

716 the number of Chi sites/strand. The results are summed over 12 enteric bacteria. The first two sets of

717 bars show results for repeats in the given strand and the comp strand, respectively. The next set of bars

718 show cases in which one repeat would create two filaments, each of which include > 20 bp from the

719 repeat. For Chi sites, this never occurs. The final two sets of bars show the number of cases in which

720 more than one marker or Chi site is positioned in the same repeat on the same strand. The error bars

721 represent the standard deviations for the randomly positioned markers.

722

723

724

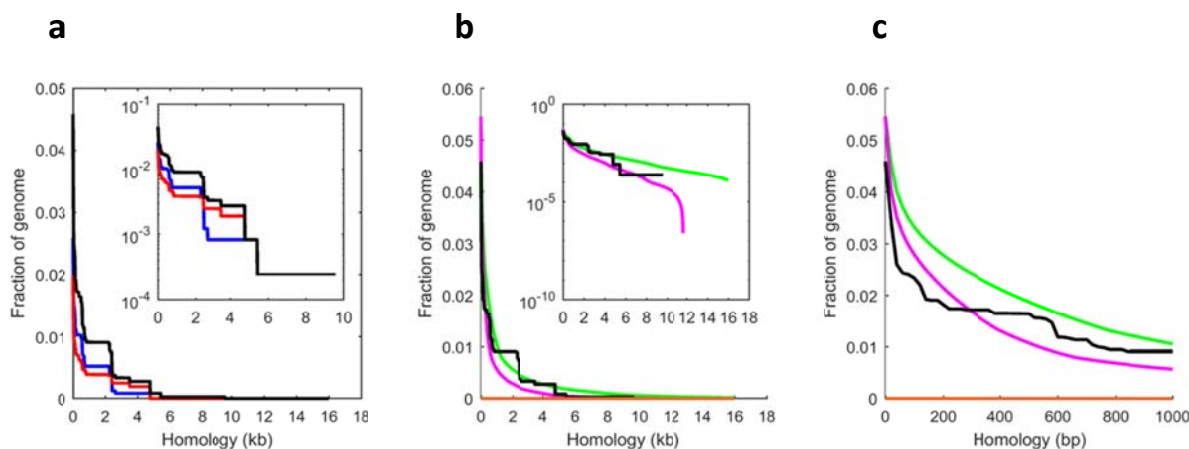

725

726

727 **Figure 7. Filaments created by the RecBCD pathway do not end in long repeated sequences. a**

728 All possible DSB1<sub>frac</sub>(n) and DSB2<sub>frac</sub>(n) during RecBCD-mediated DSB repair of twelve enteric

729 bacterial genomes. The blue and red curves show DSB1<sub>frac</sub>(n) for the given and comp strands,

730 respectively. The black curve shows the sum of the red and blue curves. The horizontal orange line

731 along the x axis shows DSB2<sub>frac</sub>(n) = 0 for all n. For all curves the bin sizes are 20 bp. The inset

732 shows the same data with an expanded x axis and a logarithmic y axis. **b** The black and orange lines

733 are the same as in (a). The green and magenta curves show the analogous result for the hypothetical

734 DSB ends mechanism. The inset shows the same data with an expanded x axis and a logarithmic y

735 axis. **c** Same as (b) but with an extended x axis.

736

737 **Acknowledgements** T.F.T. and V.G. would like to thank members of the Godoy Lab for their help,

738 especially Margaret Downs. M.P. would also like to acknowledge useful conversations with Prof. Phillip

739 Sharp. The work was supported by Northeastern University and NIGMS RO1GM088230 to VG. C.P.

740 was supported by 'Initiative d'Excellence' program of the French State ('DYNAMO', ANR-11-LABX-

741 0011-01. Funding for C.L. was provided by HCRP (Harvard College). Support was also provided by

742 Harvard University.

743 **Author contributions** C.L. performed almost all analysis of bacterial sequences; C.D. performed all

744 experiments, and contributed to the experimental design and data analysis; T.F.T. and V.G provided the

745 DNA Pol IV protein, contributed to the experimental design, and offered structural insight; C.P.

746 contributed to the understanding of the interaction between Pol IV and RecA; and M.P. conceived the

747 study, contributed to the analysis of bacterial sequences, experimental design, and data analysis. All of

748 the authors discussed the results, contributed to the manuscript preparation, and approved the final

749 version of the manuscript.

750 **Competing interests**

751 The authors declare no competing financial interests.

752 **Author information** Correspondence should be addressed to M.P. ([prentiss@g.harvard.edu](mailto:prentiss@g.harvard.edu))

753 **References**

- 754 .
- 755 AMARAL, N., RYU, T., LI, X. & CHIOLLO, I. 2017. Nuclear dynamics of heterochromatin repair. *Trends in Genetics*, 33, 86-  
756 100.
- 757 AZEROGLU, B., MAWER, J. S. P., COCKRAM, C. A., WHITE, M. A., HASAN, A. M. M., FILATENKOVA, M. & LEACH, D. R. F.  
758 2016. RecG directs DNA synthesis during double-strand break repair. *Plos Genetics*, 12.
- 759 BAO, W., KOJIMA, K. K. & KOHANY, O. 2015. Repbase Update, a database of repetitive elements in eukaryotic genomes.  
760 *Mobile DNA*, 6, 11.
- 761 BAZEMORE, L. R., FOLTASTOGNIEW, E., TAKAHASHI, M. & RADDING, C. M. 1997. RecA tests homology at both pairing  
762 and strand exchange. *Proc. Natl. Acad. Sci. U.S.A* 94, 11863-11868.
- 763 BI, X. & LIU, L. F. 1994. recA-independent and recA-dependent Intramolecular Plasmid Recombination: Differential  
764 Homology Requirement and Distance Effect. *Journal of Molecular Biology*, 235, 414-423.
- 765 CAFARELLI, T. M., RANDS, T. J., BENSON, R. W., RUDNICKI, P. A., LIN, I. & GODOY, V. G. 2013. A Single Residue Unique to  
766 DinB-Like Proteins Limits Formation of the Polymerase IV Multiprotein Complex in Escherichia coli. *J. Bacteriol.*,  
767 195, 1179-1193.
- 768 COCKRAM, C. A., FILATENKOVA, M., DANOS, V., EL KAROUI, M. & LEACH, D. R. F. 2015. Quantitative genomic analysis of  
769 RecA protein binding during DNA double-strand break repair reveals RecBCD action in vivo. *Proc. Natl Acad. Sci.*  
770 *U.S.A.*, 112, E4735-E4742.
- 771 COX, M. M. 2007. Motoring along with the bacterial RecA protein. *Nature Rev. Mol. Cell Biol.*, 8, 127-138.
- 772 DABERT, P. & SMITH, G. R. 1997. Gene replacement with linear DNA fragments in wild-type Escherichia coli:  
773 enhancement by Chi Sites *Genetics*, 145, 877.
- 774 DANILOWICZ, C., HERMANS, L., COLJEE, V., PRÉVOST, C. & PRENTISS, M. 2017. ATP hydrolysis provides functions that  
775 promote rejection of pairings between different copies of long repeated sequences. *Nucleic Acids Res* 45, 8448-  
776 8462.
- 777 DANILOWICZ, C., YANG, D., KELLEY, C., PRÉVOST, C. & PRENTISS, M. 2015. The poor homology stringency in the  
778 heteroduplex allows strand exchange to incorporate desirable mismatches without sacrificing recognition in  
779 vivo. *Nucleic Acids Res.*, 43, 6473-6485.
- 780 DILLINGHAM, M. S. & KOWALCZYKOWSKI, S. C. 2008. RecBCD Enzyme and the Repair of Double-Stranded DNA Breaks.  
781 *Microbiology and Molecular Biology Reviews*, 72, 642-+.
- 782 GUPTA, R. C., GOLUB, E. I., WOLD, M. S. & RADDING, C. M. 1998. Polarity of DNA strand exchange promoted by  
783 recombination proteins of the RecA family. *Proc. Natl Acad. Sci. U.S.A.*, 95, 9843-9848.
- 784 HENRIKUS, S. S., WOOD, E. A., MCDONALD, J. P., COX, M. M., WOODGATE, R., GOODMAN, M. F., VAN OIJEN, A. M. &  
785 ROBINSON, A. 2018. DNA polymerase IV primarily operates outside of DNA replication forks in Escherichia coli.  
786 *PLOS Genetics*, 14, e1007161.
- 787 HOWARD-FLANDERS, P., WEST, S. C. & STASIAK, Z. 1984. Role of RecA protein spiral filaments in genetic-recombination.  
788 *Nature*, 309, 215-220.
- 789 HSIEH, P., CAMERINI-OTERO, C. S. & CAMERINI-OTERO, R. D. 1992. The synapsis event in the homologous pairing of  
790 DNAs: RecA recognizes and pairs less than one helical repeat of DNA. *Proc. Natl Acad. Sci. U.S.A.* , 89, 6492-6496.
- 791 KOWALCZYKOWSKI, S. C. 2000. Initiation of genetic recombination and recombination-dependent replication. *Trends in*  
792 *Biochemical Sciences*, 25, 156-165.
- 793 KOWALCZYKOWSKI, S. C. 2015. An overview of the molecular mechanisms of recombinational DNA repair. *Cold Spring*  
794 *Harb. Perspect. Biol.*, 7.
- 795 LI, X., STITH, C. M., BURGERS, P. M. & HEYER, W. D. 2009. PCNA is required for initiation of recombination-associated  
796 DNA synthesis by DNA polymerase delta. *Mol. Cell*, 36, 704-713.



- 797 LIU, J., SNEEDEN, J. & HEYER, W. D. 2011. In Vitro Assays for DNA Pairing and Recombination-Associated DNA Synthesis.  
798 *In: TSUBOUCHI, H. (ed.) DNA Recombination: Methods and Protocols.*
- 799 LOVETT, S. 2006. Replication arrest-stimulated recombinatin: Dependence on the RecA parapog, RadA/Sms and  
800 translesion polymerase, DinB. *DNA Repair*, 5, 1421-1427.
- 801 LOVETT, S. T., HURLEY, R. L., SUTERA, V. A., AUBUCHON, R. H. & LEBEDEVA, M. A. 2002. Crossing over between regions  
802 of limited homology in Escherichia coli: RecA-dependent and RecA-independent pathways. *Genetics*, 160, 851-  
803 859.
- 804 MAWER, J. S. P. & LEACH, D. R. F. 2014. Branch migration prevents DNA loss during double-strand break repair. *Plos*  
805 *Genetics*, 10.
- 806 PRENTISS, M., PRÉVOST, C. & DANILOWICZ, C. 2015. Structure/function relationships in RecA protein-mediated  
807 homology recognition and strand exchange. *Crit. Rev. Biochem. Mol. Biol.*, 1-24.
- 808 QI, Z., REDDING, S., LEE, J. Y., GIBB, B., KWON, Y., NIU, H., GAINES, W. A., SUNG, P. & GREENE, E. C. 2015. DNA Sequence  
809 alignment by microhomology sampling during homologous recombination. *Cell* 160, 856-869.
- 810 ROSSELLI, W. & STASIAK, A. 1990 Energetics of RecA-mediated recombination reactions—without ATP hydrolysis RecA  
811 can mediate polar strand exchange but is unable to recycle. *J. Mol. Biol.*, 216, 335–352.
- 812 RYU, T., BONNER, M. R. & CHIOLLO, I. 2016. Cervantes and Quijote protect heterochromatin from aberrant  
813 recombination and lead the way to the nuclear periphery. *Nucleus*, 7, 485-497.
- 814 SAGI, D., TLUSTY, T. & STAVANS, J. 2006. High fidelity of RecA-catalyzed recombination: a watchdog of genetic diversity.  
815 *Nucleic Acids Res.*, 34, 5021-5031.
- 816 SHEN, P. & HUANG, H. V. 1986. Homologous recombination in Escherichia coli—dependence on substrate length and  
817 homology. *Genetics*, 112, 441-457.
- 818 SINGLETON, M. R., DILLINGHAM, M. S., GAUDIER, M., KOWALCZYKOWSKI, S. C. & WIGLEY, D. B. 2004. Crystal structure  
819 of RecBCD enzyme reveals a machine for processing DNA breaks. *Nature*, 432, 187-193.
- 820 SMITH, G. R. 1991. Conjugal recombination in Escherichia coli - myths and mechanisms *Cell*, 64, 19-27.
- 821 SMITH, G. R. 2012. How RecBCD enzyme and Chi promote DNA break repair and recombination: a molecular biologist's  
822 view. *Microbiol. and Mol. Biol. Rev.*, 76, 217-228.
- 823 SMITH, G. R., KUNES, S. M., SCHULTZ, D. W., TAYLOR, A. & TRIMAN, K. L. 1981. Structure of chi hotspots of generalized  
824 recombination *Cell*, 24, 429-436.
- 825 SYMINGTON, L. S. 2014. End resection at double-strand breaks: mechanism and regulation. *Cold Spring Harb. Perspect.*  
826 *Biol.*, 6, a016436.
- 827 TASHJIAN, T. F., LIN, I., BELT, V., CAFARELLI, T. M. & GODOY, V. G. 2017. RNA primer extension hinders DNA synthesis by  
828 Escherichia coli mutagenic DNA Polymerase IV. *Front. Microbiol*, 8:288.
- 829 TAYLOR, A. F. & SMITH, G. R. 1992. RecBCD enzyme is altered upon cutting DNA at a Chi recombination hotspot. *Proc.*  
830 *Natl. Acad. Sci. U.S.A.*, 89, 5226-5230.
- 831 VAN DER HEIJDEN, T., MODESTI, M., HAGE, S., KANAAR, R., WYMAN, C. & DEKKER, C. 2008. Homologous recombination  
832 in real time: DNA strand exchange by RecA. *Mol. Cell*, 30, 530-538.
- 833 VLASSAKIS, J., FEINSTEIN, E., YANG, D., TILLOY, A., WEILLER, D., KATES-HARBECK, J., COLJEE, V. & PRENTISS, M. 2013.  
834 Tension on dsDNA bound to ssDNA-RecA filaments may play an important role in driving efficient and accurate  
835 homology recognition and strand exchange. *Physical Review E*, 87, 032702.
- 836 VOLODIN, A. A., BOCHAROVA, T. N., SMIRNOVA, E. A. & CAMERINI-OTERO, R. D. 2009. Reversibility, equilibration, and  
837 fidelity of strand exchange reaction between short oligonucleotides promoted by RecA protein from escherichia  
838 coli and human Rad51 and Dmc1 proteins. *J. Biol. Chem.*, 284, 1495-1504.
- 839 WATT, V. M., INGLES, C. J., URDEA, M. S. & RUTTER, W. J. 1985. Homology requirements for recombination in  
840 Escherichia coli. *Proc. Natl. Acad. Sci., USA* 82, 4768-4772.
- 841 WILKINSON, M., CHABAN, Y. & WIGLEY, D. B. 2016. Mechanism for nuclease regulation in RecBCD. *eLife*, 5, e18227.
- 842 YANG, D. R., BOYER, B., PREVOST, C., DANILOWICZ, C. & PRENTISS, M. 2015. Integrating multi-scale data on homologous  
843 recombination into a new recognition mechanism based on simulations of the RecA-ssDNA/dsDNA structure.  
844 *Nucleic Acids Res.*, 43, 10251-10263.

846

847

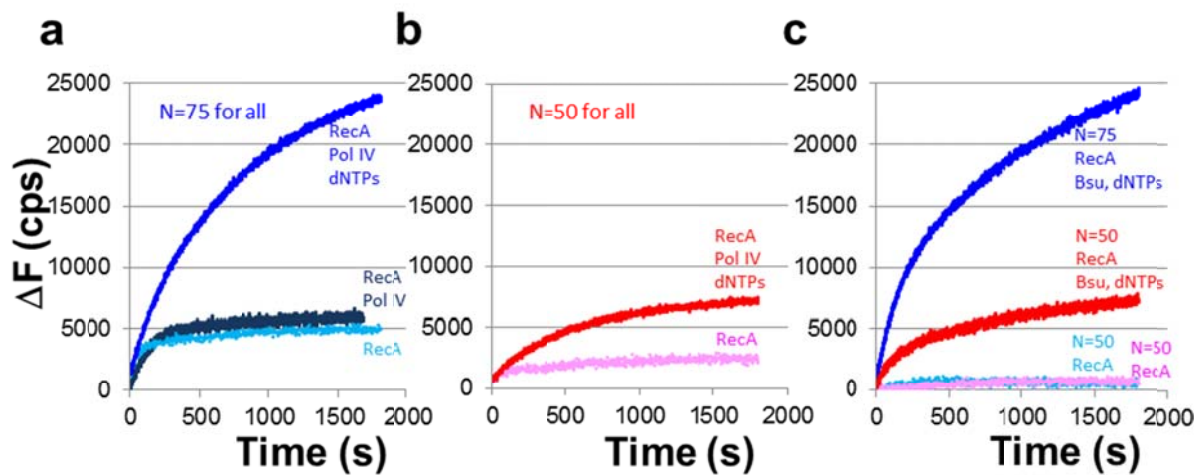

848

849 **Figure 3- figure supplement 1  $\Delta F$  vs. time curves in the presence and absence of DNA polymerase**  
850 **where initial fluorescence values for the heterologous filament have been subtracted from the**  
851 **observed values. a**  $\Delta F$  vs. time curves for N = 75 in the presence of dATP- ssDNA-RecA filaments  
852 (RecA), DNA Pol IV, and dNTPs (royal blue); analogous results with dATP-ssDNA-RecA filaments and  
853 DNA Pol IV but without dNTPs (dark blue); results in the presence of dATP-ssDNA-RecA filaments  
854 only (light blue). **b**  $\Delta F$  vs. time curves for N = 50 in the presence of dATP-ssDNA-RecA filaments,  
855 DNA Pol IV, and dNTPs (red), and dATP-ssDNA-RecA filaments only (pink). **c**  $\Delta F$  vs. time curves in  
856 the presence of ATP-ssDNA-RecA filaments, LF-Bsu, and dNTPs for N = 75 (blue) and N = 50 (red),  
857 and results in the presence of ATP-ssDNA-RecA filaments only for N = 75 (light blue) and N = 50  
858 (pink).

859

860

861

862

863

864

865

866

867

868

869

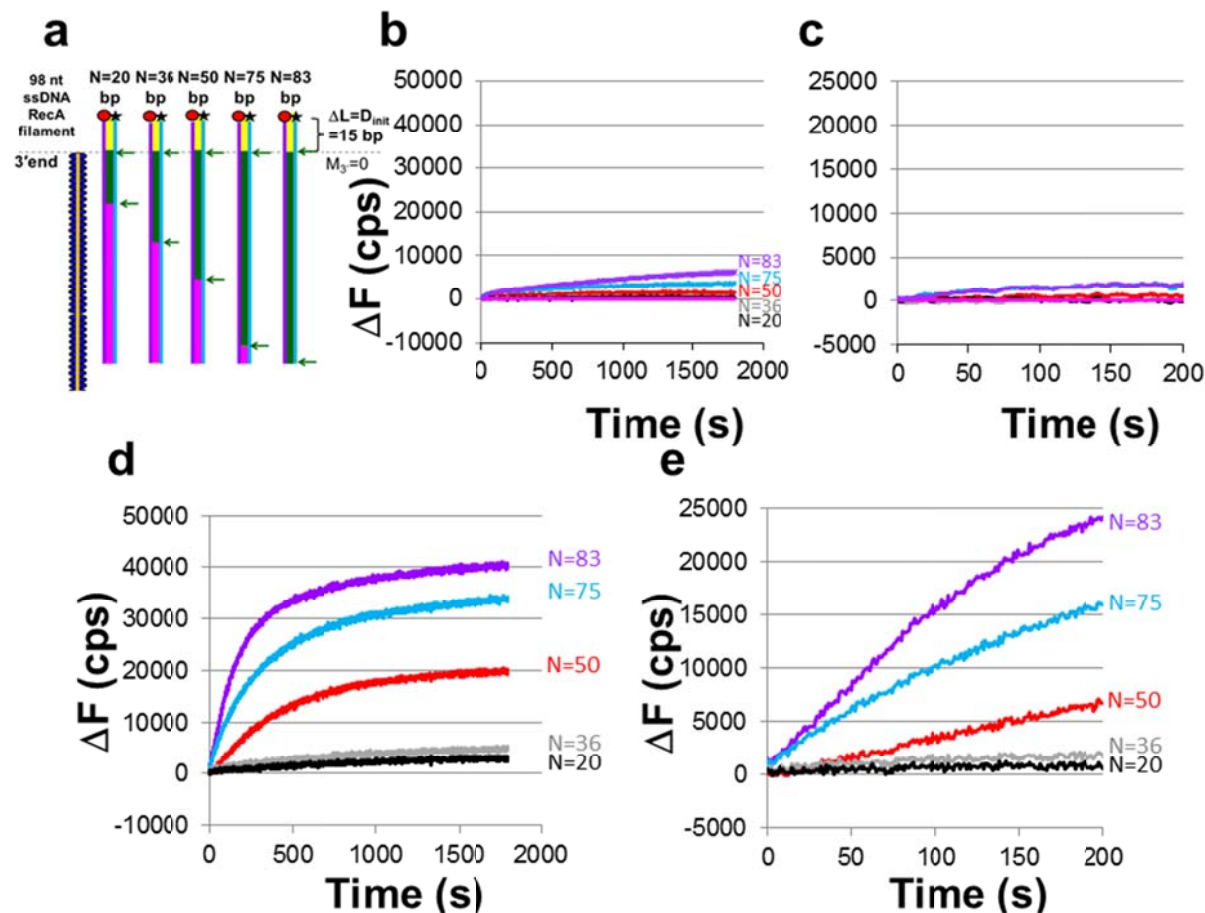

870

871 **Figure 3- figure supplement 2  $\Delta F$  vs. time curves in the absence and presence of LF-Bsu**  
 872 **polymerase.** **a** Schematic of the experiments. Each of the ssDNA-RecA filaments was formed on a 98  
 873 nt ssDNA. One such filament is illustrated by the orange line with blue ellipses. Each representation of  
 874 the same 98 bp dsDNA is colored to indicate the region of the dsDNA containing the N contiguous bases  
 875 that are sequence matched to the bases in each of the different initiating strands. The N matched bases  
 876 are shown in green and highlighted by green arrows. The N value for each illustration is listed above the  
 877 dsDNA. Non-sequence matched bases within and beyond the matching filament region are shown in  
 878 magenta and yellow, respectively; N values are 20, 36, 50, 75 and 83. **b**  $\Delta F$  vs. time curves in the  
 879 presence of ATP-ssDNA-RecA filaments without LF-Bsu for N = 83 (purple), 75 (blue), 50 (red), 36  
 880 (gray), 20 (black), and heterologous ssDNA-RecA filament (magenta). **c** First 200 s of data without  
 881 polymerase shown in (b). **d**  $\Delta F$  vs. time curves in the presence of ATP-ssDNA-RecA filaments and LF-  
 882 Bsu where the heterologous curve was subtracted for N = 83 (purple), 75 (blue), 50 (red), 36 (gray), and  
 883 20 (black). **e** First 200 s of data with LF-Bsu shown in (d).

884

885

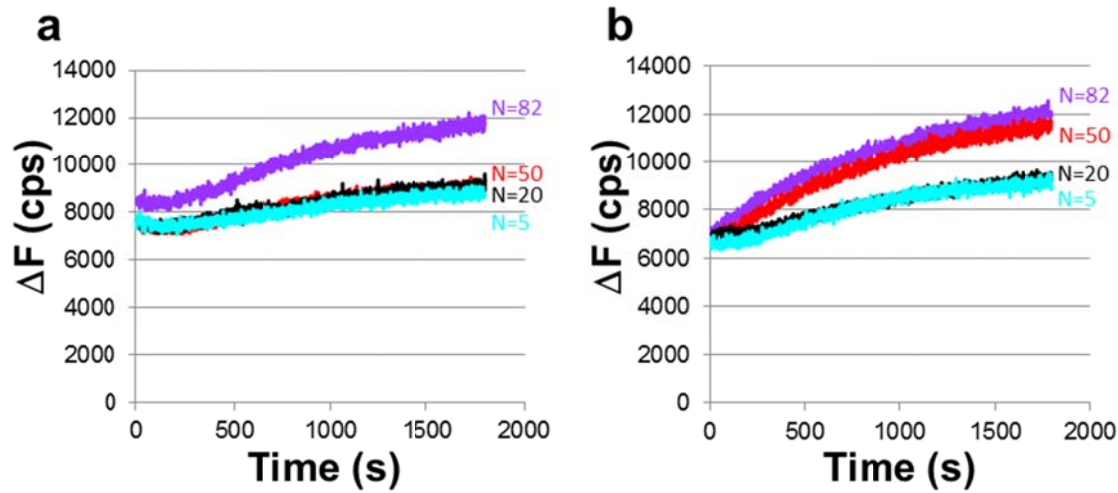

886

887 **Figure 4- figure supplement 1 Raw fluorescence vs. time curves for dATP-ssDNA-RecA filaments,**  
888 **DNA Pol IV, and 180 bp labeled dsDNA construct; data shown in Figure 4b, d. a**  $\Delta F$  vs. time curves  
889 for raw data corresponding to Figure 4b and N = 82 (purple), 50 (red), 20 (black), and 5 (cyan). **b**  $\Delta F$   
890 vs. time curves for raw data corresponding to Figure 4d and N = 82 (purple), 50 (red), 20 (black), and 5  
891 (cyan).

892

893

894

895

896

897

898

899

900

901

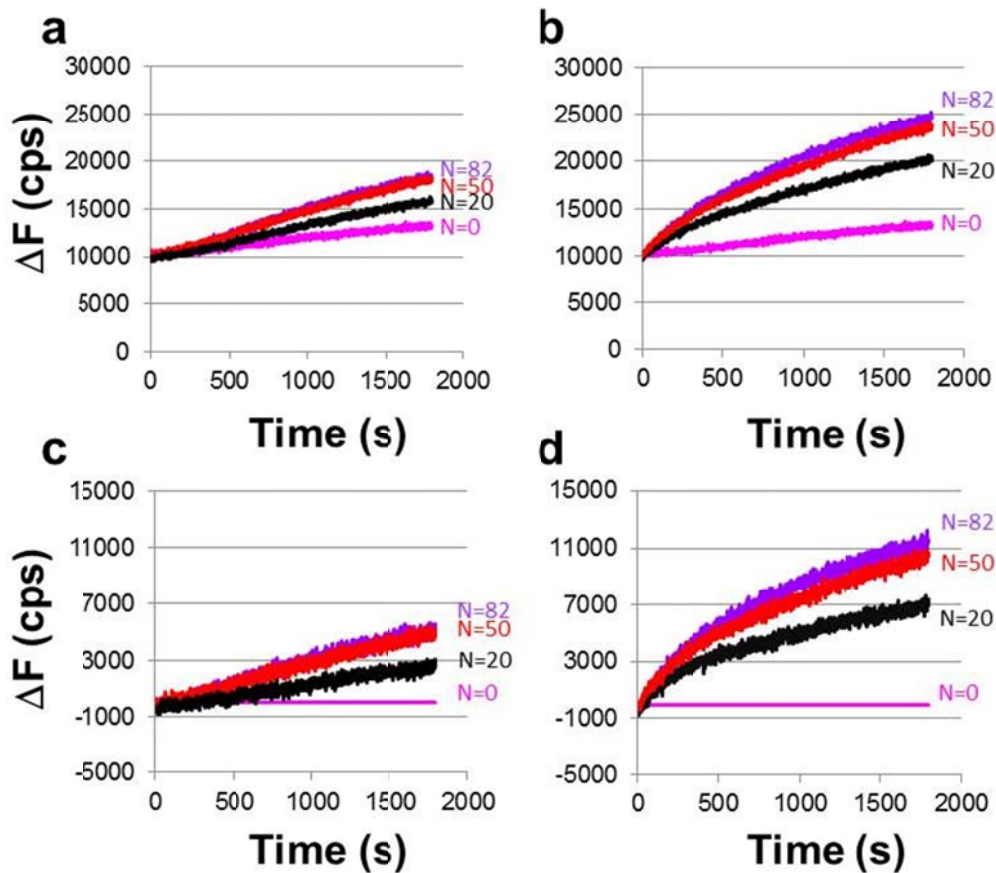

902

903 **Figure 4- figure supplement 2  $\Delta F$  vs. time curves obtained with ATP-ssDNA-RecA filaments, LF-**  
904 **Bsu polymerase, and 180 bp labeled dsDNA construct.** The purple, red, black, and magenta curves  
905 correspond to  $N = 82, 50,$  and  $20,$  and heterologous DNA, respectively. **a** Raw data for one filament  
906 experiments with LF-Bsu, represented by the schematic shown in Figure 4a. **b** Raw data for two  
907 filament experiments with LF-Bsu, represented by the schematic shown in Figure 4c. **c**  $\Delta F$  vs. time  
908 curves shown in **(a)** after subtracting the heterologous DNA curve. **d**  $\Delta F$  vs. time curves shown in **(b)**  
909 after subtracting the heterologous DNA curve.

910

911

912

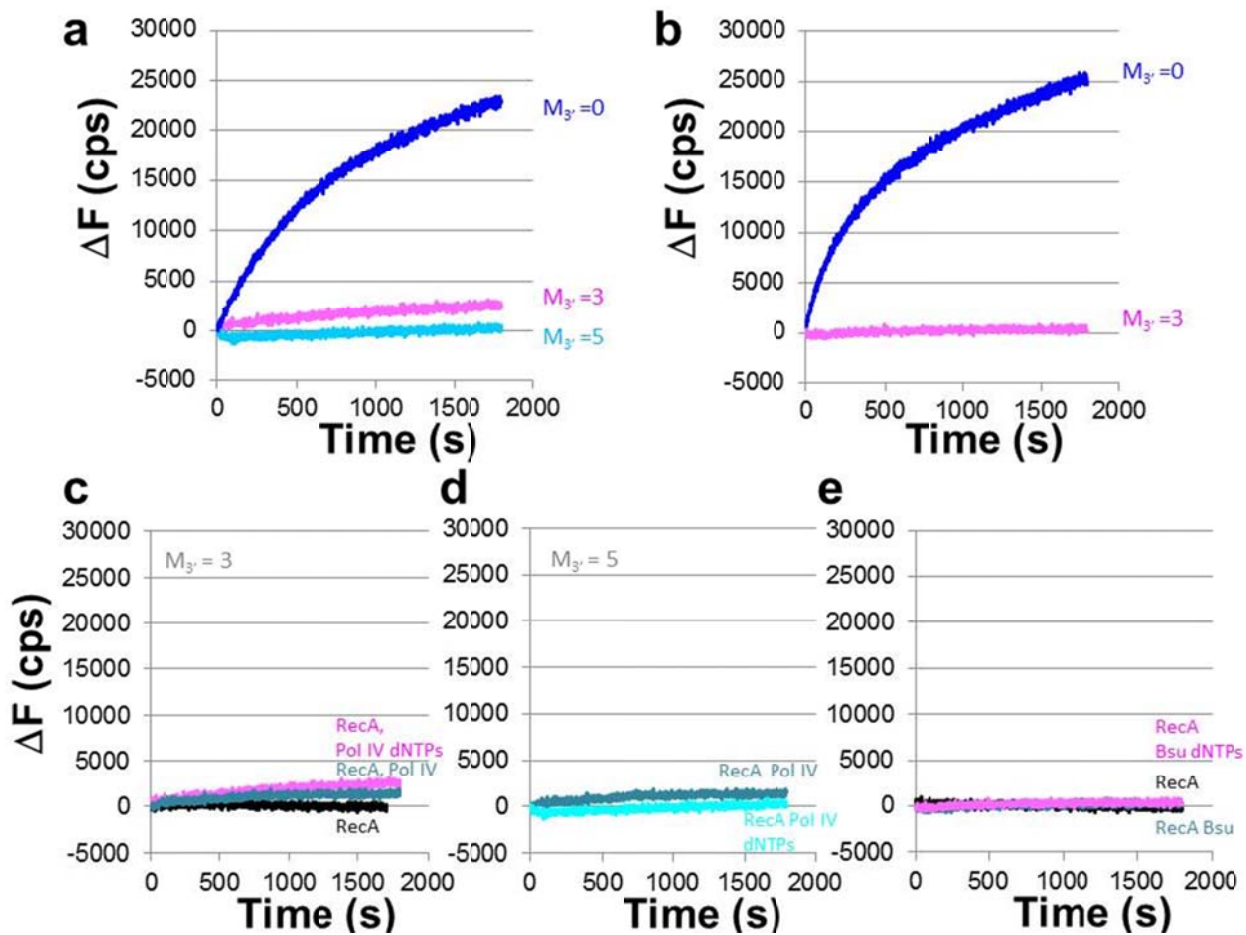

913

914

915

916

917

918

919

920

921

922

923

924

925

926

**Figure 5 – figure supplement 1 Control experiments for the data shown in Figure 5b, c.** **a** Same as Figure 5b;  $\Delta F$  vs. time curves in the presence of dATP-ssDNA-RecA filaments (RecA), DNA Pol IV, and dNTPs where the blue, light blue, and pink curves correspond to  $M_{3'}$  values of 0, 3, and 5 base mismatches, respectively. **b** Same as Figure 5c; results in the presence of ATP-ssDNA-RecA filaments, LF-Bsu polymerase, and dNTPs. **c** Interactions with  $M_{3'} = 3$  dATP-ssDNA-RecA filaments without any DNA polymerase (black), with  $M_{3'} = 3$  dATP-ssDNA-RecA filaments, DNA Pol IV, and no dNTPs (blue), and with  $M_{3'} = 3$  dATP-ssDNA-RecA filaments, DNA Pol IV, and dNTPs (pink). **d** Results with  $M_{3'} = 5$  ssDNA-RecA filaments, DNA Pol IV, and no dNTPs (blue-green) and with  $M_{3'} = 5$  ssDNA-RecA filaments, DNA Pol IV, and dNTPs (cyan). **e** Results are analogous to (c) with  $M_{3'} = 3$  ATP-ssDNA-RecA filaments and LF-Bsu.

927

928

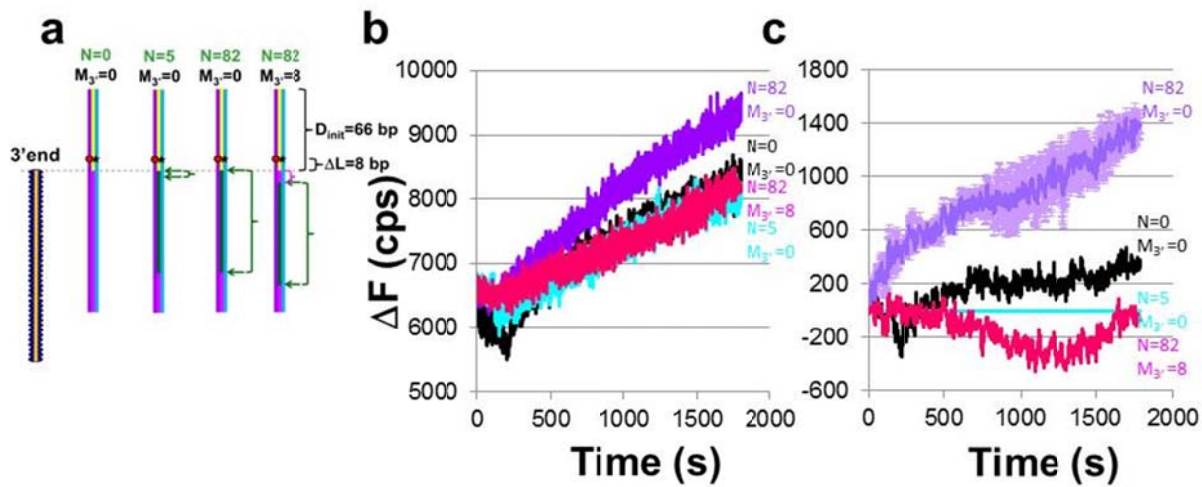

929

930

931

932

933

934

935

936

937

938

939

940

941

942

943

944

**Figure 5 – figure supplement 2 M3' dependence of DNA synthesis by DNA Pol IV.** **a** Schematic of the experiment. The orange, purple, and blue lines indicate the initiating, complementary, and outgoing strands, respectively. The blue ovals indicate the RecA in the initial ssDNA-RecA filament. Different ssDNA sequences are used presenting regions of homology of variable length with respect to the 180 bp dsDNA construct. The green rectangles indicate regions of the dsDNA target that are sequence matched to the corresponding bases in the initiating strand. The magenta rectangle indicates regions of the dsDNA that are heterologous to the corresponding bases in the initiating strand. The dashed line indicates the position of the 3' end of the ssDNA-RecA filament when the green region is adjacent to the sequence matched bases in the ssDNA-RecA filament. The yellow region indicates bases in the dsDNA that are beyond the 3' end of the ssDNA-RecA filament and heterologous to the bases in the filament. **b** ΔF vs. time curves for dATP-ssDNA-RecA filaments and DNA Pol IV for N = 82 M<sub>3'</sub> = 0 (purple) and N = 82 M<sub>3'</sub> = 8 (dark pink). Controls with no mismatches (M<sub>3'</sub> = 0) are also shown by the cyan (N = 5) and the black (N = 0) curves. **c** ΔΔF vs. time curves where raw fluorescence vs. time for N = 5 in (b) was subtracted from the other raw fluorescence vs. time curves. The light purple error bars correspond to the standard deviation for two repetitions of the N = 82 M<sub>3'</sub> = 0 data.

945

946

947

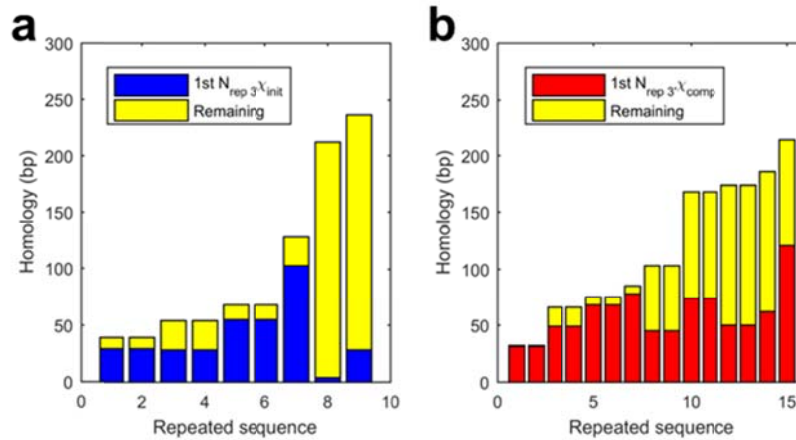

948

949

950 **Figure 6 – figure supplement 1 Expanded view of Figure 6a, b shown in the main text. a** Repeats in  
951 the given strand that include a Chi site. The total height of the bar corresponds to the total length of the  
952 repeat. The height of dark blue regions corresponds to the part of the repeat that is on the 5' side of the  
953 Chi site that is most distant from the 3' end of the repeat. The height of the yellow regions corresponds  
954 to the portions of the long repeat that would be degraded by RecBCD because they are on the 3' side of  
955 both the Chi sites; x-axis expanded to highlight the 9 shortest repeats. **b** Analogous results for the comp  
956 strand. The regions that are colored dark blue in (a) are colored red in (b).



|                                                                                                                                                                                                             | ecoli_MP |        |        | ecoli1      |        |        | ecoli2      |        |        |
|-------------------------------------------------------------------------------------------------------------------------------------------------------------------------------------------------------------|----------|--------|--------|-------------|--------|--------|-------------|--------|--------|
|                                                                                                                                                                                                             | random   | st dev | actual | random      | st dev | actual | random      | st dev | actual |
| # given strand hits                                                                                                                                                                                         | 40.55    | 6.93   | 23     | 59.39       | 7.74   | 32     | 16.41       | 3.81   | 6      |
| # comp strand hits                                                                                                                                                                                          | 39.75    | 5.65   | 27     | 61.26       | 7.92   | 35     | 16.65       | 3.86   | 3      |
| # >=2 given same repeat                                                                                                                                                                                     | 3.45     | 1.70   | 5      | 6.54        | 1.87   | 3      | 1.76        | 0.93   | 1      |
| # >=2 comp same repeat                                                                                                                                                                                      | 3.58     | 1.64   | 3      | 6.97        | 1.89   | 5      | 1.74        | 0.85   | 1      |
| # of repeats containing hits on each strand.No Chi site pair is correctly positioned to create filament pair that includes the same repeat. Incorrectly positioned Chi site pairs are highlighted in yellow | 4.71     | 1.94   | 0      | 9.61        | 2.16   | 0      | 1.67        | 1.16   | 0      |
| Number of Chi sites in comp strand                                                                                                                                                                          |          |        | 551    |             |        | 595    |             |        | 506    |
| Number of Chi sites in given strand                                                                                                                                                                         |          |        | 571    |             |        | 581    |             |        | 493    |
|                                                                                                                                                                                                             |          |        |        |             |        |        |             |        |        |
|                                                                                                                                                                                                             |          |        |        |             |        |        |             |        |        |
|                                                                                                                                                                                                             | ecoli5   |        |        | salmonella1 |        |        | salmonella2 |        |        |
|                                                                                                                                                                                                             | random   | st dev | actual | random      | st dev | actual | random      | st dev | actual |
| # given strand hits                                                                                                                                                                                         | 52.56    | 6.99   | 28     | 9.58        | 3.37   | 7      | 8.50        | 2.88   | 3      |
| # comp strand hits                                                                                                                                                                                          | 52.21    | 6.98   | 28     | 8.64        | 2.83   | 2      | 8.42        | 3.25   | 10     |
| # >=2 given same repeat                                                                                                                                                                                     | 5.94     | 2.20   | 5      | 1.33        | 0.72   | 1      | 1.30        | 0.55   | 1      |
| # >=2 comp same repeat                                                                                                                                                                                      | 5.85     | 2.00   | 3      | 1.22        | 0.43   | 1      | 1.34        | 0.58   | 2      |
| # of repeats containing hits on each strand.No Chi site pair is correctly positioned to create filament pair that includes the same repeat. Incorrectly positioned Chi site pairs are highlighted in yellow | 8.47     | 2.58   | 0      | 0.77        | 0.77   | 2      | 0.86        | 1.00   | 2      |
| Number of Chi sites in comp strand                                                                                                                                                                          |          |        | 572    |             |        | 307    |             |        | 414    |
| Number of Chi sites in given strand                                                                                                                                                                         |          |        | 578    |             |        | 349    |             |        | 415    |

957

958

959 **Supplementary Table 1 Comparison between occurrences of Chi sites within repeats longer than**  
960 **20 bp and analogous occurrences for an equal number of randomly positioned markers. Separate**  
961 **results are shown for each of 12 enteric bacteria.**

962

|                                                                                                                                                                                                             | shigella1   |        |        | shigella2 |        |        | klebsiella1 |        |        |
|-------------------------------------------------------------------------------------------------------------------------------------------------------------------------------------------------------------|-------------|--------|--------|-----------|--------|--------|-------------|--------|--------|
|                                                                                                                                                                                                             | random      | st dev | actual | random    | st dev | actual | random      | st dev | actual |
| # given strand hits                                                                                                                                                                                         | 53.47       | 6.83   | 11     | 41.25     | 6.06   | 8      | 21.24       | 4.28   | 16     |
| # comp strand hits                                                                                                                                                                                          | 52.33       | 6.34   | 2      | 44.29     | 5.65   | 11     | 20.24       | 4.61   | 12     |
| # >=2 given same repeat                                                                                                                                                                                     | 4.89        | 2.03   | 3      | 3.66      | 1.62   | 3      | 2.35        | 1.08   | 1      |
| # >=2 comp same repeat                                                                                                                                                                                      | 4.63        | 1.78   | 1      | 3.95      | 1.54   | 3      | 2.26        | 1.00   | 1      |
| # of repeats containing hits on each strand.No Chi site pair is correctly positioned to create filament pair that includes the same repeat. Incorrectly positioned Chi site pairs are highlighted in yellow | 7.15        | 2.60   | 0      | 5.20      | 2.43   | 0      | 2.86        | 1.38   | 0      |
| Number of Chi sites in comp strand                                                                                                                                                                          |             |        | 463    |           |        | 499    |             |        | 924    |
| Number of Chi sites in given strand                                                                                                                                                                         |             |        | 466    |           |        | 469    |             |        | 942    |
|                                                                                                                                                                                                             |             |        |        |           |        |        |             |        |        |
|                                                                                                                                                                                                             | klebsiella2 |        |        | proteus1  |        |        | proteus2    |        |        |
|                                                                                                                                                                                                             | random      | st dev | actual | random    | st dev | actual | random      | st dev | actual |
| # given strand hits                                                                                                                                                                                         | 21.64       | 4.25   | 16     | 3.66      | 2.09   | 1      | 6.59        | 2.38   | 2      |
| # comp strand hits                                                                                                                                                                                          | 21.44       | 4.70   | 12     | 3.98      | 1.97   | 1      | 6.23        | 2.58   | 3      |
| # >=2 given same repeat                                                                                                                                                                                     | 2.27        | 1.19   | 1      | 0.91      | 0.40   | 0      | 1.23        | 0.49   | 1      |
| # >=2 comp same repeat                                                                                                                                                                                      | 2.27        | 1.05   | 1      | 0.93      | 0.28   | 0      | 1.17        | 0.52   | 1      |
| # of repeats containing hits on each strand.No Chi site pair is correctly positioned to create filament pair that includes the same repeat. Incorrectly positioned Chi site pairs are highlighted in yellow | 2.53        | 1.48   | 0      | 0.09      | 0.31   | 0      | 1.01        | 0.91   | 2      |
| Number of Chi sites in comp strand                                                                                                                                                                          |             |        | 927    |           |        | 159    |             |        | 144    |
| Number of Chi sites in given strand                                                                                                                                                                         |             |        | 941    |           |        | 146    |             |        | 161    |

963

964

965 Supplementary Table 1 continuation

966

| <b>Sum over all Genomes</b>                     |               |               |               |
|-------------------------------------------------|---------------|---------------|---------------|
|                                                 | <b>random</b> | <b>st dev</b> | <b>actual</b> |
| <b># given strand hits</b>                      | 334.84        | 17.91         | 153           |
| <b># comp strand hits</b>                       | 335.44        | 17.40         | 146           |
| <b># both in same repeat correctly oriented</b> | 22.47         | 2.99          | 0             |
| <b># &gt;=2 given same repea</b>                | 35.63         | 4.76          | 25            |
| <b># &gt;=2 comp same repea</b>                 | 35.91         | 4.41          | 22            |
|                                                 |               |               |               |
| <b>Number of Chi sites in comp strand</b>       |               |               | 6061          |
| <b>Number of Chi sites in given strand</b>      |               |               | 6112          |

967

968

969 Supplementary Table 1 continuation

970

971

972
